1 **Prolactin and prolactin receptor expression in the HPG axis and crop during parental care in both**  
2 **sexes of a biparental bird (*Columba livia*)**

3 Victoria S. Farrar<sup>1\*</sup>, Rayna M. Harris<sup>1</sup>, Suzanne H. Austin<sup>1</sup>, Brandon M. Nava Ultreras<sup>1</sup>, April M. Booth<sup>1</sup>,  
4 Frédéric Angelier<sup>3</sup>, Andrew S. Lang<sup>2</sup>, Tanner Feustel<sup>1</sup>, Candice Lee<sup>1</sup>, Annie Bond<sup>1</sup>, Matthew D.  
5 MacManes<sup>2</sup>, Rebecca M. Calisi<sup>1</sup>

6

7 <sup>1</sup>Department of Neurobiology, Physiology and Behavior, University of California, Davis, Davis, CA,  
8 95616.

9 <sup>2</sup>Department of Molecular, Cellular and Biomedical Sciences, University of New Hampshire, Durham,  
10 NH, 03824.

11 <sup>3</sup>Centre d'Etudes Biologiques de Chizé, CNRS, UMR 7372, 79360 Villiers en Bois, France

12

13 \*Corresponding author. Email address: [vsfarrar@ucdavis.edu](mailto:vsfarrar@ucdavis.edu)

## 14 **Abstract**

15           During breeding, multiple circulating hormones, including prolactin, facilitate reproductive  
16 transitions in species that exhibit parental care. Prolactin underlies parental behaviors and related  
17 physiological changes across many vertebrates, including birds and mammals. While circulating prolactin  
18 levels often fluctuate across breeding, less is known about how relevant target tissues vary in their  
19 prolactin responsiveness via prolactin receptor (*PRLR*) expression. Recent studies have also investigated  
20 prolactin (*PRL*) gene expression outside of the pituitary (i.e., extra-pituitary *PRL*), but how *PRL* gene  
21 expression varies during parental care in non-pituitary tissue (e.g., hypothalamus, gonads) remains largely  
22 unknown. Further, it is unclear if and how tissue-specific *PRL* and *PRLR* vary between the sexes during  
23 biparental care. To address this, we measured *PRL* and *PRLR* gene expression in tissues relevant to  
24 parental care, the endocrine reproductive hypothalamic-pituitary- gonadal (HPG) axis and the crop (a  
25 tissue with a similar function as the mammalian mammary gland), across various reproductive stages in  
26 both sexes of a biparental bird, the rock dove (*Columba livia*). We also assessed how these genes  
27 responded to changes in offspring presence by adding chicks mid-incubation, simulating an early hatch  
28 when prolactin levels were still moderately low. We found that pituitary *PRL* expression showed similar  
29 increases as plasma prolactin levels, and detected extra-pituitary *PRL* in the hypothalamus, gonads and  
30 crop. Hypothalamic and gonadal *PRLR* expression also changed as birds began incubation. Crop *PRLR*  
31 expression correlated with plasma prolactin, peaking when chicks hatched. In response to replacing eggs  
32 with a novel chick mid-incubation, hypothalamic and gonadal *PRL* and *PRLR* gene expression differed  
33 significantly compared to mid-incubation controls, even when plasma prolactin levels did not differ. We  
34 also found sex differences in *PRL* and *PRLR* that suggest gene expression may allow males to compensate  
35 for lower levels in prolactin by upregulating *PRLR* in all tissues. Overall, this study advances our  
36 understanding of how tissue-specific changes in responsiveness to parental hormones may differ across  
37 key reproductive transitions, in response to offspring cues, and between the sexes.

38

39

## 40 **1. Introduction**

41           In animals that exhibit offspring care, an array of physiological changes must occur to facilitate  
42 parental behaviors. This transition requires synchronized changes at many physiological levels, from the  
43 brain (Bridges, 2015; Champagne and Curley, 2012) to the reproductive organs (Stiver and Alonzo,  
44 2009). Hormones facilitate those changes, including those produced by the reproductive or hypothalamic-  
45 pituitary-gonadal (HPG) axis, through their pleiotropic effects on multiple behavioral and physiological  
46 traits (Ketterson et al., 2009; Zera and Harshman, 2001). Similarly, tissue responsiveness to hormones,  
47 via hormone receptor expression, must also change to produce a synchronized parental phenotype across  
48 the brain and periphery (Ball and Balthazart, 2008).

49           One such hormone, prolactin, plays an important role in parental behavior across vertebrates, but  
50 is particularly important in birds (Angelier and Chastel, 2009). Best known for promoting lactation in  
51 mammals, prolactin also underlies the onset and maintenance of parental behaviors in birds such as  
52 incubation onset, offspring defense and provisioning (Angelier and Chastel, 2009; Buntin, 1996; Smiley,  
53 2019). Circulating prolactin is released by the anterior pituitary gland, and acts upon specific receptors to  
54 trigger signaling pathways in target cells. Once in circulation, prolactin acts upon its receptor (PRLR) to  
55 activate secondary messenger cascades in target cells, such as the signal transducer and activator of  
56 transcription 5 (STAT5) pathway (Austin and Word, 2018; Freeman et al., 2000). Prolactin receptors have  
57 been identified in nearly every tissue type in both mammalian and avian species, reinforcing its role in  
58 multiple physiological and behavioral processes including reproduction, immune function, and  
59 homeostasis (Nagano and Kelly, 1999; Zhou et al., 1996). Additionally, evidence for local prolactin  
60 expression beyond the pituitary gland (i.e. extra-pituitary prolactin) has been identified in tissues ranging  
61 from the gonads to the mammary glands and the brain (Ben-Jonathan et al., 1996; Marano and Ben-  
62 Jonathan, 2014).

63           While circulating prolactin often increases during parenthood, less is known about how  
64 concordant responsiveness to prolactin changes in the brain. In female rats, *PRLR* mRNA increases in

65 some hypothalamic nuclei, and hypothalamic responsiveness to prolactin (measured via STAT5  
66 phosphorylation downstream of the PRLR) increases with reproductive experience (Anderson et al., 2006;  
67 Sjoeholm et al., 2011). In birds, brain responsiveness to prolactin increases during breeding compared to  
68 non-breeding individuals of multiple species (Buntin and Buntin, 2014; Smiley et al., 2021), and prolactin  
69 binding varies seasonally, including during breeding (Smiley et al., 2020). However, how hypothalamic  
70 responsiveness to prolactin varies during transitions *within* the breeding cycle remains less studied.  
71 Understanding these subtle changes in *PRLR* expression is important, as changing neural responsiveness  
72 to prolactin may prepare behavioral and endocrine systems for the onset of offspring care. For instance, in  
73 mammals, prolactin and placental lactogen secretion increases during pregnancy to facilitate lactation and  
74 maternal adaptations for postnatal care (Bridges, 2015). In birds, prolactin increases after egg laying to  
75 promote incubation behavior with a subsequent increase around hatching to facilitate chick brooding and  
76 provisioning in species that exhibit these behaviors (Angelier et al., 2016b; Buntin, 1996; Smiley, 2019).  
77 Thus, changes in *PRLR* expression with offspring cues and fluctuating plasma prolactin levels may play a  
78 role in prolactin's facilitation of parental behaviors.

79         Beyond the brain, peripheral endocrine systems can also respond to prolactin and may influence  
80 behavior through altered hormone regulation. *PRLR* gene and protein expression has been documented in  
81 the pituitary gland, gonads and other tissues across vertebrates (Aoki et al., 2019; Nagano and Kelly,  
82 1999; Zhou et al., 1996). Prolactin can have an “anti-gonadal” effect in some species, where high  
83 circulating levels inhibit sex steroid release and gonadal function (Grattan, 2018; Meier, 1969; Moulton and  
84 Besser, 1981), which may serve to maintain parental efforts on the current brood rather than continuing  
85 breeding or starting a new clutch (Angelier et al., 2016b). These effects may be modulated in part by  
86 prolactin's effects on pituitary gonadotroph cells in the release of luteinizing hormone (LH) or follicle-  
87 stimulating hormone (FSH), or by direct action on sex steroid production in the gonads (Bachelot and  
88 Binart, 2007). Any of these diverse effects on the HPG axis, and ultimately, reproductive behaviors,  
89 would depend upon a tissue's function and ability to respond to prolactin. Thus, measuring how *PRLR*

90 varies across the HPG axis during parental care is key to understanding how prolactin may exert  
91 pleiotropic effects during breeding.

92

93 Further, local prolactin expression in the brain and other tissues may also vary during parental  
94 care and play an autocrine/paracrine role in hormone regulation (Ben-Jonathan et al., 1996; Marano and  
95 Ben-Jonathan, 2014). Extra-pituitary prolactin (*ePRL*) gene expression has been measured in various  
96 tissues, including the brain, gonads and mammary glands, though its specific role and function remains  
97 unclear (Ben-Jonathan et al., 1996; Marano and Ben-Jonathan, 2014). While there is some debate whether  
98 *ePRL* becomes a functional protein (Grattan and Le Tissier, 2015), hypophysectomized rats have been  
99 shown to have immunoreactive prolactin protein in their brains (DeVito, 1988), giving evidence that  
100 bioactive prolactin can be locally translated beyond the pituitary. Characterizing if, and how, *ePRL*  
101 expression changes in the HPG axis and responds to offspring cues will lay the groundwork to explore  
102 any potential role this gene may play in reproductive physiology or behavior.

103 Rock doves (*Columba livia*) provide a powerful model to explore the dynamics of prolactin and  
104 its receptor across parental care and between the sexes. These birds form monogamous bonds and exhibit  
105 biparental care, with both sexes incubating eggs and provisioning offspring. Additionally, rock doves  
106 produce “crop milk” to feed their offspring, which is regulated by circulating prolactin (Abs, 1983;  
107 Horseman and Buntin, 1995). Unlike mammals, both male and female rock doves pseudo-lactate,  
108 allowing the comparison of sex differences without the confounds of pregnancy and female-only  
109 lactation. In doves, prolactin maintains incubation behaviors and facilitates the onset of chick  
110 provisioning, rising mid-incubation and peaking around hatch in both sexes (Austin et al., *in review*;  
111 Cheng and Burke, 1983; Horseman and Buntin, 1995; Ramsey et al., 1985). Prolactin then remains  
112 elevated post-hatching to facilitate both crop milk production and chick brooding/provisioning, a pattern  
113 typical of avian species with altricial young (Angelier and Chastel, 2009; Smiley, 2019). Additionally,  
114 we detected *PRLR* and *PRL* gene transcripts across the HPG axis in previous RNAseq studies (Austin et

115 al., 2021a; Calisi et al., 2018; MacManes et al., 2017), setting a foundation to examine patterns of  
116 expression in these genes during parental care.

117

118         In this study, we examined how reproductive tissues vary in prolactin responsiveness and local  
119 prolactin expression across breeding and in response to offspring presence. Our goal was to understand  
120 how regulation at the tissue level may facilitate and coordinate reproductive transitions beyond circulating  
121 hormones alone. First, we characterized the expression of prolactin (*PRL*) and its receptor (*PRLR*) across  
122 multiple stages of parental care in the hypothalamus, pituitary, and gonads of both sexes. We also  
123 characterized these genes in the crop sac (“crop”), which is where crop milk is produced in doves. Then,  
124 we tested the influence of offspring cues on *PRL* and *PRLR* by introducing chicks at mid-incubation,  
125 before plasma prolactin is elevated and crops are fully functional for chick provisioning and lactation  
126 (Dong et al., 2012; Horseman and Buntin, 1995). We compared this “early hatch” manipulation to the  
127 equivalent stage at mid-incubation as a control group. Through this manipulation, we assessed to what  
128 degree offspring presence influences prolactin gene dynamics separate from the rise in circulating  
129 prolactin normally seen before hatch (Austin et al., 2021b). We hypothesized that offspring presence  
130 drives prolactin and prolactin responsiveness in key tissues. Therefore, we predicted plasma prolactin  
131 levels and *PRLR* expression would increase when chicks were added mid-incubation to compensate for  
132 normally low circulating prolactin levels at this stage. Alternatively, the priming effect of circulating  
133 prolactin before hatch may drive tissue responsiveness to prolactin. In this case, we predicted that chick  
134 presence alone would not increase *PRLR* expression, as hormonal priming was not yet completed. These  
135 hypotheses are not mutually exclusive and may be supported in some tissues under examination, but not  
136 others. Lastly, because both male and female rock doves exhibit the same suite of parental behaviors, we  
137 hypothesized that prolactin gene dynamics would be similar between the sexes.

## 138 2. Methods

139 This project was conducted in conjunction with a larger RNAseq study of the HPG axis during  
140 reproduction and parental care in rock doves (*Columba livia*). However, the focus of this study is  
141 prolactin-related gene dynamics in key tissues, including the crop. Thus, in addition to the HPG tissues ( $n$   
142  $\cong 10$ /sex/sampling point, see [Supplemental Table 1](#) for exact sample sizes), we also collected crop tissue  
143 from a randomly-selected subset ( $n = 73$ ) of these male-female pairs of breeding rock doves at focal  
144 stages of reproduction. We also collected crop tissues from an additional 20 individuals who were not part  
145 of the RNAseq study to increase sample sizes per stage (total  $n = 93$ , see [Supp. Table 1](#)). We focused on  
146 the following stages of reproduction: nest building (building), clutch completion/early incubation  
147 (incubation day 3: incubation begins when the first egg is laid in this species) (Abs, 1983), mid-  
148 incubation (incubation day 9), and the day the first chick hatched (hatch) (see Austin et al., 2021b, for  
149 more details). Additionally, to understand the influence of external cues on candidate gene expression, we  
150 also included a manipulation group (early hatch), where we experimentally reduced the length of the  
151 incubation period by replacing eggs with one young chick at mid-incubation (on incubation day 8) and  
152 then collected the pair ~24 hours later. Circulating hormone data for these same individual birds across  
153 multiple stages of parental care were reported previously in Austin et al. (2021b). Here, we extend that  
154 study with the first gene expression data from these individuals, reporting *PRL* and *PRLR* gene counts  
155 across the hypothalamus, pituitary, and gonads and crop.

### 156 2.1 Study Animals

157 Rock doves (*Columba livia*) were socially housed in outdoor flight aviaries (1.5 x 1.2 x 2.1 m),  
158 each containing 8-10 breeding pairs, and were provided with nesting material (straw) and nest sites  
159 (wooden nest boxes, 16 per aviary). These outdoor aviaries exposed the birds to natural photoperiod for  
160 the area (Davis, California, USA), and photoperiod was supplemented with 14L:10D artificial lighting  
161 year-round. Birds were fed whole corn, turkey/game bird starter (30% protein; Modesto Milling, CA) and

162 *grit ad libitum*. We used birds that were reproductively experienced and < 2 years old in this study.

163 Further details can be found in Austin et al. (2021b).

## 164 *2.2 Tissue Collection*

165 Brain, pituitary, gonads, crop and trunk blood (for circulating hormones) were collected from  
166 birds at each timepoint following approved IACUC protocols (UC Davis protocol #20618). Tissues were  
167 flash frozen (brain, crop) or immediately placed in RNALater (Thermo Fisher) then flash frozen (pituitary  
168 and gonads) and stored at -80°C until use in downstream analyses. An additional 20 birds were collected  
169 in the same manner for crop tissues. For detailed collection methods and handling of HPG tissues (see  
170 Austin et al. 2021a; Calisi et al. 2018; MacManes et al. 2017), and for experimental design see Austin et  
171 al. (2021b). All of the subjects in this study, with the exception of the additional 20 birds collected for  
172 crop tissues alone, are included in Austin et al. (2021b).

## 173 *2.3 RNA-sequencing for total gene expression*

174 Before RNA processing, the hypothalamus and lateral septum were isolated using punch biopsy  
175 on a Leica CM 1860 cryostat and stored in RNALater at - 80 C before analysis (see Calisi et al 2018;  
176 MacManes et al, 2017 Austin et al. 2021a for details). Processing of brains, pituitaries, and gonads for  
177 RNA sequencing is described in detail in Austin et al., 2021a and Lang et al., 2020. Briefly, RNA from  
178 the hypothalamus, pituitary, and gonads was prepared for Illumina sequencing using the NEB Next Ultra  
179 Directional RNA Library Prep Kit, and sequenced on an Illumina HiSeq 400 via 125 base pair paired-end  
180 sequencing (Novogene). Reads were pseudomapped (*kallisto*: Bray et al., 2016) to the Rock Dove  
181 transcriptome v1.1.0 whose transcripts were annotated with genes from *Gallus gallus* genome v5 using  
182 BLAST. Transcriptomic data were then imported into the R statistical language using tximport (Soneson  
183 et al., 2016) and gene counts were variance-stabilized using the DEseq2 package (Love et al., 2014).  
184 Variance-stabilized gene counts for each sample were used in statistical analysis.



185 2.4 *Quantitative PCR*

186 To measure gene expression in the crop, we ran quantitative PCR (qPCR) on a subset of crops  
187 from each of the reproductive timepoints. For crop sample sizes by stage and sex, see [Supplemental Table](#)  
188 [1](#).

189 To extract total RNA from crops, we first homogenized an approximately 10 mg sample from  
190 each crop tissue using the OmniTip Tissue Homogenizer (Omni International), followed by RNA  
191 extraction using the Direct-zol RNA Miniprep kit (Zymo) with modifications recommended for lipid-rich  
192 tissues. We verified RNA purity and concentration using a NanoDrop 2000c (Thermo Scientific). For  
193 each sample, we treated 500 ng of RNA with DNase (Perfecta; QuantaBio) then performed cDNA reverse  
194 transcription using the QuantiTect Reverse Transcription Kit (Qiagen). We then ran real-time qPCR  
195 reactions with SYBR Green detection chemistry using the following reaction mix: 10  $\mu$ L total reaction  
196 volume containing 1  $\mu$ L cDNA template (diluted 1:5), 5  $\mu$ L 2X SSOAdvanced SYBR Green PCR mix  
197 (BioRad), and 10  $\mu$ M each of primer. We ran each reaction under the following conditions: 50 $^{\circ}$  for 2  
198 min, 95 $^{\circ}$  for 10 min, and then 40 cycles of 95 $^{\circ}$  for 15 sec and 60 $^{\circ}$  for 30 sec. We ran samples in  
199 duplicate for each gene on the same 384-well plate using a CFX384 Touch Real-time PCR detection  
200 system (BioRad). We validated all primers for this study by running a 10-fold serial dilution to determine  
201 amplification efficiencies (average: 97.2%  $\pm$  5.63) and checked melt curves for a single product. Primer  
202 sequences, efficiencies, and amplicon lengths can be found in [Supplemental Table 2](#).

203 We then quantified the relative expression of each gene of interest (*PRL* and *PRLR*) relative to the  
204 geometric mean of the reference genes, beta-actin (*ACTB*) and ribosomal protein L4 (*rpL4*) (Zinzow-  
205 Kramer et al., 2014) using the ddCt method (Livak and Schmittgen, 2001). We found no significant effect  
206 of reproductive stage ( $F_{4,83} = 1.6$ ,  $p = 0.17$ ), sex ( $F_{1,83} = 0.9$ ,  $p = 0.36$ ) or their interaction ( $F_{4,83} = 1.2$ ,  $p$   
207  $= 0.33$ ) on mean reference gene expression, indicating stable reference genes for crop tissue. Samples that  
208 did not cross the cycle threshold within 40 cycles had Ct values set to 40. Normalized expression (dCt)  
209 was calculated as the average Cq value between technical replicates of each gene minus the geometric

210 mean of the reference genes for each sample. We calculated relative expression (ddCt) as the normalized  
211 value (dCt) minus the average normalized expression for the nest-building stage. Nest-building was used  
212 as a reference as it was the first reproductive stage included in the study, and birds were not yet caring for  
213 eggs or chicks. Fold change equals  $2^{-(\text{ddCt})}$ . We then log-transformed ( $\log_e$  or ln) fold change values for  
214 statistical analysis to improve model fit and visualization.

## 215 *2.5 Hormone measurements*

216 Plasma hormones, including prolactin, were measured and described in rock doves across  
217 multiple stages of parental care in Austin et al., (2021b). Here, we used circulating prolactin data from  
218 Austin et al. (2021b) for our stages of interest (nest building, incubation day 3, incubation day 9, hatch  
219 and the manipulation on incubation day 8) to correlate plasma prolactin with *PRL* and *PRLR* gene  
220 expression, newly reported here. Briefly, plasma prolactin levels were measured from trunk blood using a  
221 heterologous radioimmunoassay (RIA) run at the Center for Biological Studies at Chizé, France (CEBC-  
222 CNRS) as detailed in (Angelier et al., 2007). This RIA had previously been validated in rock doves by  
223 creating a dose-response curve with pooled rock dove plasma and determining parallelism with standard  
224 curves consisting of chicken prolactin (Angelier et al., 2016a). Samples for this project were run in two  
225 separate assays with intra- and inter-assay coefficients of variation (CVs) of 9.58 and 11.83%,  
226 respectively. The minimal detectable prolactin level was 0.45 ng/ml.

## 227 *2.6 Statistical analysis*

228 All statistical analyses were performed in R (v.4.0.3, R Core Team, 2020). We compared gene  
229 expression in each gene-by-tissue combination using general linear models (glm), where gene expression  
230 (either variance-stabilized gene counts for RNAseq data or log-transformed fold change for qPCR) was  
231 predicted by stage, sex, and their interaction. We analyzed each gene-by-tissue combination in a separate  
232 model for three main reasons. First, we used two different methods for estimating gene expression,  
233 RNAseq and qPCR, and thus the expression data are not directly comparable across tissues. Second, we

234 were interested in how each gene expression in tissue changed over time, responded to external  
235 manipulation, and varied by sex. Third, evidence shows that in different tissues genes for prolactin and its  
236 receptor are regulated by different promoters and transcription factors (Aoki et al., 2019; Featherstone et  
237 al., 2012), and therefore their expression should be considered independently.

238 For each glm, we ensured that our data met the model assumptions. If main effects were  
239 significant ( $\alpha = 0.05$ ), we compared group differences using pairwise comparisons of our *a-priori*  
240 hypotheses. The interaction between stage and sex was not significant for *PRL* and *PRLR* in any tissue,  
241 which suggests that males and females responded similarly across stage and to external manipulation.  
242 Because sex interactions were not significant, we did not include this term in future models (gene  
243 expression  $\sim$  stage + sex). We also present estimates, standard errors, and *p*-values of *a priori* contrasts of  
244 biological interest. Following Austin et al. (2021b), we compared each reproductive stage to the adjacent  
245 or subsequent stage in the normal course of parental care: nest building vs. clutch completion, clutch  
246 completion vs. mid-incubation, and mid-incubation vs. hatch. This approach allowed us to compare gene  
247 expression changes during key reproductive transitions. We also compared how external manipulation  
248 affected gene expression, by comparing the early hatch group to its equivalent control stage, i.e., early  
249 hatch vs. mid-incubation. To determine if adding chicks mid-incubation had a similar effect to that seen  
250 when chicks naturally hatch after 18 days of incubation, we also compared early hatch vs. hatch. A list of  
251 pairwise contrasts can be found in [Table 1](#). Finally, we examined relationships between plasma prolactin  
252 levels and gene expression within each tissue by calculating Spearman's correlation coefficients ( $\rho$ ).

### 253 3. Results

254 We examined the effect of reproductive stage and sex on plasma prolactin, and gene expression  
255 of *PRL* and *PRLR* in HPG and crop tissues. Results from *a priori* pairwise comparisons for all tissues  
256 and circulating prolactin can be found in [Table 1](#).

257 *3.1 Plasma prolactin levels*

258 As in our larger analysis of circulating prolactin (Austin et al., 2021b), we found that plasma  
259 prolactin levels varied significantly across the stages examined in this study (stage:  $F_{4,106} = 83.6$ ,  $p < 0.01$ )  
260 and with sex ( $F_{1,106} = 10.4$ ,  $p < 0.01$ ). Prolactin significantly increased from nest building to clutch  
261 completion, and from mid-incubation to hatch, but did not differ from clutch completion to mid-  
262 incubation (Fig.2). When chicks were added mid-incubation (early hatch), circulating prolactin did not  
263 significantly differ from the equivalent stage at mid-incubation, and was significantly lower than the level  
264 seen at typical hatching. Across all stages, females had significantly higher prolactin levels than males.

265 *3.2 Hypothalamic PRL and PRLR expression*

266 While there was no significant difference in hypothalamic *PRL* expression across stage in our  
267 models ( $F_{4,94} = 0.7$ ,  $p = 0.569$ ), this effect was largely driven by earlier time points. When we investigated  
268 a priori hypotheses of gene expression difference across stage, we found that birds at hatch had higher  
269 *PRL* expression compared with those at mid-incubation. When we investigated how external  
270 manipulation influenced gene expression, we found that the addition of chicks (early hatch) at mid-  
271 incubation did not significantly affect hypothalamic *PRL* levels above those seen at its control at mid-  
272 incubation. We found that *PRL* at early hatch was significantly lower than at a typical hatch (Fig. 3A,  
273 Table 1). We found a suggestive trend ( $0.05 < p < 0.10$ ) of sex on hypothalamic *PRL* in our models ( $F_{1,94}$   
274  $= 2.9$ ,  $p = 0.092$ ), suggesting that males may express hypothalamic *PRL* at slightly higher levels than  
275 females. Hypothalamic *PRL* and plasma prolactin levels were not significantly correlated (Fig.4A;  $r_{99} =$   
276  $0.12$ ,  $p = 0.200$ ).

277 Hypothalamic *PRLR* expression significantly differed by stage ( $F_{4,94} = 7.7$ ,  $p < 0.01$ ) and sex ( $F_{1,94}$   
278  $= 10.8$ ,  $p < 0.01$ ). Specifically, *PRLR* counts increased at clutch completion compared with nest building  
279 (Fig. 3B; Table 1). When we compared the early hatch manipulation to its equivalent control at mid-  
280 incubation, *PRLR* levels significantly increased (Fig. 3B, Table 1). Further, *PRLR* expression at the early

281 hatch manipulation was also significantly higher compared to hatch. We found no significant correlation  
282 between hypothalamic *PRLR* and plasma prolactin (Fig.4E;  $\tau_{99} = -0.09, p = 0.355$ ).

### 283 3.3 Pituitary *PRL* and *PRLR* expression

284 Like plasma prolactin, pituitary *PRL* gene expression varied significantly with stage ( $F_{4,98} = 47.9$ ,  
285  $p < 0.001$ ) and sex ( $F_{1,98} = 6.0, p = 0.016$ ). Pituitary *PRL* expression also increased from mid-incubation  
286 to hatching (Fig. 3C; Table 1). Unlike plasma prolactin levels, however, pituitary *PRL* significantly  
287 increased from clutch completion to mid-incubation but did not significantly change from nest building to  
288 clutch completion (Table 1). Pituitary *PRL* gene counts were significantly higher in females than males,  
289 as seen in plasma levels. As expected, pituitary *PRL* expression and plasma prolactin were significantly  
290 positively correlated (Fig.4B;  $\tau_{101} = 0.78, p < 0.001$ ).

291 Pituitary *PRLR*, in contrast, did not significantly differ across stages (Fig. 3D;  $F_{4,98} = 0.7, p =$   
292  $0.616$ ). However, we found a significant effect of sex ( $F_{1,98} = 29.0, p < 0.001$ ), where males expressed  
293 higher levels of pituitary *PRLR* than females. Unlike pituitary *PRL*, *PRLR* expression did not correlate  
294 with plasma prolactin levels (Fig 4F;  $\tau_{101} = -0.14, p = 0.146$ ).

### 295 3.4 Gonadal *PRL* and *PRLR* expression

296 *PRL* expression in the testes and ovaries/oviducts did not significantly differ with stage, though  
297 there was a suggestive trend ( $F_{4,98} = 2.2, p = 0.079$ ). This trend appears to be driven by the early hatch  
298 manipulation, which significantly increased gonadal *PRL* compared to the mid-incubation control and  
299 hatching stages (Fig. 3E, Table 1). Gonadal *PRL* also differed significantly by sex ( $F_{1,98} = 5.7, p = 0.019$ ),  
300 where testes expressed *PRL* at higher levels than ovaries and oviducts. We found no correlation between  
301 gonadal *PRL* expression and plasma prolactin (Fig. 4C;  $\tau_{101} = -0.02, p = 0.851$ ).

302 Gonadal *PRLR* expression significantly differed with stage ( $F_{4,98} = 3.0, p = 0.023$ ). Gonadal  
303 *PRLR* decreased at clutch completion compared with nest building, but did not differ from clutch  
304 completion to mid-incubation or mid-incubation to hatch (Fig. 3F, Table 1). At early hatch, gonadal

305 *PRLR* expression did not significantly change compared to mid-incubation levels, though early hatch  
306 levels were significantly lower than at hatch. Further, there was a significant sex effect ( $F_{1,98} = 154.4$ ,  $p <$   
307  $0.001$ ), where testes expressed more *PRLR* than ovaries/oviducts at all stages. Gonadal *PRLR* expression  
308 was significantly negatively correlated with plasma prolactin (Fig.4G;  $r_{101} = -0.28$ ,  $p = 0.005$ ).

### 309 3.5 Crop *PRL* and *PRLR* expression

310 In the crop, *PRL* expression remained relatively constant, with no significant stage effect detected  
311 (Fig. 3G;  $F_{4,83} = 0.21$ ,  $p = 0.930$ ). However, we found crop *PRL* expression differed by sex ( $F_{1,83} = 4.50$ ,  $p$   
312  $= 0.037$ ) with males having higher *PRL* than females. Crop *PRL* was not correlated with plasma prolactin  
313 (Fig.4D;  $r_{80} = -0.03$ ,  $p = 0.827$ ).

314 Unlike *PRL*, crop *PRLR* expression differed significantly by stage ( $F_{4,87} = 4.30$ ,  $p = 0.003$ ). This  
315 effect was likely driven by increased expression at hatch, which was higher than every other stage in  
316 contrasts (Fig. 3H, Table 1). However, crop *PRLR* levels did not significantly differ after the early hatch  
317 manipulation compared to mid-incubation controls. We did not find a significant effect of sex on crop  
318 *PRLR* expression ( $F_{1,87} = 0.19$ ,  $p = 0.665$ ). We found a suggestive positive correlation between crop  
319 *PRLR* and plasma prolactin ( $r_{80} = 0.25$ ,  $p = 0.060$ ), which is likely driven by levels at hatch (Fig.4H).

## 320 4. Discussion

321 We characterized how circulating prolactin, *PRL* and *PRLR* gene expression in the HPG axis and  
322 crop varied across four reproductive stages (nest building, clutch completion, mid-incubation, and hatch)  
323 in both male and female rock doves. We then tested how externally manipulating the development period  
324 by adding offspring halfway through incubation influenced prolactin and HPG and crop tissue *PRL* and  
325 *PRLR* gene expression levels ~24 hours later. This study thus provides a finer resolution into how  
326 prolactin gene expression changes across specific reproductive stages and within specific tissues  
327 important for parental care.

328 We found that circulating prolactin was lowest at nest building and highest after chicks hatch.  
329 Pituitary *PRL* gene expression mirrored this pattern, as expected. Hypothalamic *PRL* also increased at  
330 hatching. We did not observe significant differences in gonad or crop *PRL* expression across the  
331 reproductive stages measured. *PRLR* expression also did not differ across reproductive stages in the HPG  
332 or crop. However, some tissues showed significant increases in *PRLR* across specific transitions during  
333 parental care (such as from nest building to early incubation), though the overall effect size of these  
334 increases was relatively small, and the biological significance of these changes remains to be tested. We  
335 also found significant sex differences in prolactin and *PRL/PRLR* gene expression. In response to  
336 offspring presence, we found no significant difference in circulating prolactin levels as compared to the  
337 mid-incubation control. However, chick presence significantly increased hypothalamic *PRLR* and  
338 decreased gonadal *PRL*. The early hatch manipulation did not affect pituitary or crop gene expression.

#### 339 *4.1 Characterization of PRL and PRLR expression across the HPG and crop*

340 In the hypothalamus, a key regulatory center for reproductive and parental behavior, we found  
341 that *PRL* gene expression increased when chicks hatched. Prolactin can act upon hypothalamic nuclei,  
342 such as the preoptic area (POA), to regulate key parental behaviors in birds and mammals (Brown et al.,  
343 2017; Dobolyi et al., 2014; Slawski and Buntin, 1995). Prolactin can also physiologically coordinate  
344 parental care through actions on the hypothalamus, such as affecting overall HPG axis regulation via  
345 hypothalamic gonadotropin releasing hormone (GnRH) neurons (Grattan et al., 2007; Rozenboim et al.,  
346 1993), or regulating energy balance and hyperphagia through hypothalamic neuropeptide Y (Buntin et al.,  
347 1991; Lopez-Vicchi et al., 2020; Slawski and Buntin, 1995). In birds, both prolactin protein and gene  
348 expression, as well as prolactin binding and receptors have been identified in the hypothalamus (Buntin  
349 and Ruzycki, 1987; Buntin and Walsh, 1988; Chaiseha et al., 2012; Ramesh et al., 2000; Smiley et al.,  
350 2021). We found that *PRL* expression significantly changed from mid-incubation to hatching in the brain.  
351 This is consistent with rodent studies, where hypothalamic *PRL* mRNA also increased from pregnancy to  
352 lactation in female rats (Torner et al., 2004, 2002). Extra-pituitary *PRL* may play a role in regulating the

353 stress hyporesponsiveness seen during maternal care (Torner et al., 2004), though it remains unclear  
354 whether hypothalamic *PRL* is actually translated into a functional protein. We thus extend previous  
355 studies characterizing hypothalamic *PRL* expression in the avian brain by showing that its expression  
356 changes during parental care.

357         We also found that hypothalamic *PRLR* increased from nest building to clutch completion. This  
358 increase in hypothalamic responsiveness to prolactin may facilitate incubation behavior (Buntin 1996).  
359 Studies in birds have linked incubation behavior with increases in circulating prolactin (Angelier and  
360 Chastel, 2009; Hope et al., 2020; Ramsey et al., 1985; Sockman et al., 2000). We found that plasma  
361 prolactin increased from nest building to clutch completion (the third day of incubation in this species),  
362 and that hypothalamic *PRLR* also increased during this transition. This increase suggests that behavioral  
363 centers in the brain become more responsive to prolactin levels to facilitate incubation behavior. Previous  
364 studies show intracerebroventricular injections of prolactin increased incubation in turkey hens  
365 (Youngren et al 1991), but did not induce incubation in ring doves (Buntin and Tesch, 1985). In light of  
366 our findings, it is possible that the isolated, non-breeding doves in Buntin and Tesch (1985) may have not  
367 upregulated *PRLR* levels sufficiently to behaviorally respond to the injections of prolactin. Progesterone  
368 and estradiol may also upregulate hypothalamic *PRLR* during this transition, as these hormones facilitate  
369 incubation in doves (Michel, 1977; Silver, 1978). However, prolactin itself does not appear to upregulate  
370 its receptor in the hypothalamus, as we found no significant correlation between hypothalamic *PRLR* and  
371 plasma prolactin. This result differs from turkey hypothalamic *PRLR*, which was negatively correlated  
372 with plasma prolactin (Zhou et al., 1996). Causal studies which manipulate prolactin or other hormones  
373 involved in incubation behavior are needed to further understand drivers of hypothalamic *PRLR* across  
374 this transition.

375         In the pituitary, we found that *PRL* gene expression mirrored plasma prolactin patterns, while  
376 *PRLR* did not. Nearly all circulating prolactin originates from lactotroph cells in the anterior pituitary  
377 (Freeman et al., 2000), thus, a correlation between pituitary *PRL* and plasma prolactin was expected. Like  
378 plasma levels, pituitary *PRL* was lowest at nest building, rose at clutch completion/early incubation, and



379 peaked at hatch, consistent with other studies in doves and pigeons (Cheng and Burke, 1983; Dong et al.,  
380 2012; Horseman and Buntin, 1995). Slight differences in pituitary *PRL* in comparison to plasma levels  
381 may be due to different drivers for prolactin peptide secretion versus gene transcription. For instance, we  
382 observed a significant increase in plasma prolactin at clutch completion, but no concordant significant  
383 change in pituitary *PRL*. Stored prolactin peptide may have been released to facilitate the onset of  
384 incubation, as prolactin has been shown to increase after the first egg is laid (when incubation begins in  
385 doves;(Cheng and Burke, 1983; Lea et al., 1986). Vasoactive intestinal peptide (VIP), a neuropeptide that  
386 stimulates the release of prolactin from the pituitary in birds (Macnamee et al., 1986; Vleck and Patrick,  
387 1999) typically increases around incubation as well (Cloues et al., 1990) which may have caused prolactin  
388 release but not upregulation of *PRL*. Later, we find that pituitary *PRL* mRNA significantly increased from  
389 clutch completion to mid-incubation, but observed no change in plasma levels. This difference may be  
390 due to increased lactotroph recruitment in the pituitary (Pitts et al., 1994), which would lead to higher  
391 overall *PRL* transcription that may be stored for release later in incubation. Lastly, we found that *PRLR*  
392 did not change across the reproductive stages measured. While the role of the *PRLR* in the pituitary  
393 remains unclear, it may play a role in autocrine negative feedback (as seen in mammals; Ferraris et al.,  
394 2012). However, this potential role remains untested in birds.

395 Gonadal *PRL* and *PRLR*, in contrast, did not differ across the reproductive stages we measured.  
396 We found no significant changes in gonadal *PRL* in either sex, though gonad *PRLR* increased in both the  
397 testes and ovaries/oviducts at clutch completion compared to nest building. Prolactin treatment has been  
398 shown to have an anti-gonadal effect in birds, leading to reduced gonad size (Meier, 1969; Meier et al.,  
399 1971) and sex steroid secretion (Camper and Burke, 1977; Reddy et al., 2002). In chickens, FSH, but not  
400 LH, increased ovarian *PRLR* (Hu et al., 2017). However, FSH has been shown to increase during nest  
401 building and decrease around ovulation / laying in doves (Cheng and Balthazart, 1982), which does not  
402 support that FSH may drive gonadal *PRLR*. This relationship, however, may differ across sexes and  
403 species. In male rats, for instance, FSH treatment decreased testicular *PRLR* expression in the Sertoli cells  
404 (Guillaumot and Benahmed, 1999). *PRLR* may play a role in spermatogenesis, as hyperprolactinemia

405 reduces sperm count in mammals (Gill-Sharma, 2009), though such a relationship remains unstudied in  
406 birds. The increased gonadal *PRLR* in this study could indicate that *PRLR* regulates sex steroids, which  
407 are often higher before laying than during parental care in doves (Austin et al., 2021b; Dong et al., 2012;  
408 Feder et al., 1977). We did not find significant changes in estradiol or testosterone between nest building  
409 and clutch completion (where gonadal *PRLR* increased) (Austin et al., 2021b), though progesterone levels  
410 fluctuate significantly as birds began incubation (Austin et al., 2021b). Increased prolactin responsiveness  
411 in the gonads may possibly alter steroidogenic pathways and progesterone release, though this has not  
412 been tested. Clearly, more comparative research into the effects of prolactin on gametogenesis and  
413 steroidogenesis in the gonads is needed.

414 In the crop, *PRLR* expression patterns more closely mirrored plasma prolactin levels, though we  
415 found no variation in crop *PRL*. Like circulating prolactin and pituitary *PRL*, crop *PRLR* significantly  
416 increased at hatching, but did not differ across nest building and incubation. This pattern is consistent  
417 with crop weight changes across the dove breeding cycle, where crop thickness and weight peaks around  
418 hatching in conjunction with crop milk production (Cheng and Burke, 1983). As the crop is highly  
419 responsive to prolactin (Horseman and Buntin, 1995; Riddle and Braucher, 1931) and prolactin regulates  
420 its own binding in this tissue (Shani et al., 1981), our results reiterate that prolactin levels likely drive  
421 crop *PRLR* gene expression. Crop *PRLR* dynamics are consistent with mammalian mammary gland cells,  
422 where prolactin also upregulates *PRLR* expression (Bera et al., 1994; Swaminathan et al., 2008). While  
423 low, relative expression of *PRL* was detectable in both sexes. In mammals, autocrine ePRL plays a role in  
424 mammary gland differentiation and initiation of lactation (Chen et al., 2012), as well as in milk protein  
425 expression (Hennighausen et al., 1997). Unlike the mammary gland, the crop epithelium proliferates but  
426 does not differentiate (Gillespie et al., 2013); whether autocrine *PRL* plays a role in crop development  
427 remains unknown. Our results show that prolactin gene dynamics may be similar across convergently  
428 evolved organs for lactation, which opens the door for exciting comparative studies of “milk” production  
429 across species.

430 *4.2 Effects of offspring presence on PRL and PRLR gene expression*

431           In response to the early hatch manipulation, where chicks were added mid-incubation to examine  
432 response to offspring presence, neither circulating/plasma prolactin levels nor pituitary *PRL* expression  
433 significantly changed compared to mid-incubation. Exposure to chicks increased plasma prolactin in  
434 previous studies (Buntin, 1979; Hansen, 1966; Lea and Vowles, 1985). In doves, chick exposure for four  
435 days in early or mid-incubation led to significant increases in crop weight, suggesting increased prolactin  
436 (as the crop is known to be highly prolactin-responsive) (Hansen, 1966). In parental doves deprived of  
437 their own young for 24 hours, pituitary reserves of prolactin decreased after just one hour of chick  
438 exposure, indicating prolactin was released into circulation from the pituitary (Buntin, 1979). However,  
439 we did not see an increase in plasma prolactin or pituitary *PRL* transcription after 24 hours of chick  
440 exposure. This lack of response may have occurred because our sampling time course ( $\cong$ 24 hours after  
441 chicks were added) may have missed the window of any significant changes in prolactin. We may have  
442 missed an initial spike in prolactin release or transcription, as Buntin (1979) observed after one hour with  
443 chicks. Alternatively, 24 hours may have been not enough time to reliably upregulate *PRL* transcription or  
444 release. Secondly, it is possible that sufficient priming, either by hormonal secretion or internal rhythms  
445 during incubation, had not occurred. Indeed, 5 hours of offspring presence only stimulated prolactin  
446 release in non-breeding female ring doves that had been primed through estradiol and progesterone  
447 treatments (Lea and Vowles, 1985). In previous studies, doves were already in a chick-rearing state  
448 (deprived of their own chicks; Buntin, 1979) or had been given sufficient time to respond (i.e., more than  
449 one day; Hansen, 1966). Thus, if the manipulation had occurred later in incubation and closer to a natural  
450 hatch date, birds may have been more flexible in their ability to elevate prolactin in response to chick  
451 cues. Comparisons of our findings with a manipulation later in incubation could test this hypothesis.

452           Although plasma prolactin remained unchanged, hypothalamic *PRLR* increased when chicks were  
453 added, to levels significantly above those of mid-incubation or typical hatch. This increase suggests that  
454 neural responsiveness to prolactin may have increased to compensate for the typically low circulating  
455 prolactin at this stage and to facilitate a parental response to chicks. Indeed, parental behaviors can  
456 spontaneously occur without subsequent increases in prolactin (Wang & Buntin 1999), and we observed

457 parents brooding and attempting to feed chicks during this manipulation (Austin et al., 2021b). This  
458 behavior may have been facilitated by the increasing responsiveness to prolactin in hypothalamic nuclei  
459 like the POA, where prolactin is critical for chick feeding in doves (Buntin et al., 1991; Slawski and  
460 Buntin, 1995). Our findings also suggest that the hypothalamus may be able to respond more quickly to  
461 offspring cues than prolactin release from the pituitary, as plasma prolactin remained unchanged after the  
462 same period of chick exposure. Although we examined the hypothalamus as a whole, future examination  
463 of specific nuclei or cell-types could clarify where this *PRLR* response occurs.

464 We also observed significant upregulation of *PRL* and downregulation *PRLR* in the gonads of  
465 both sexes. Like hypothalamic *PRLR*, gonadal expression of these genes differed from both the mid-  
466 incubation control and typical hatch. Studies show that sex steroids like estradiol or progesterone are  
467 required to exhibit parental behaviors in birds (El Halawani et al., 1986; Hutchison, 1975), including  
468 response to chicks (Lea and Vowles, 1985). As previously suggested, increased local *PRL* transcription  
469 could shift steroidogenic pathways to increase necessary sex steroid production and facilitate a parental  
470 response. However, this hypothesis is not supported by the fact that estradiol significantly decreased in  
471 females in this study when chicks were added mid-incubation, and testosterone remained unaffected  
472 (Austin et al., 2021b). Alternatively, altered prolactin regulation could play a role in a gonadal stress  
473 response, as this manipulation increased circulating corticosterone in this study compared to mid-  
474 incubation (Austin et al., 2021b). This hypothesis is not supported because gonadal *PRL* or *PRLR*  
475 transcription did not change in non-breeding rock doves after an acute stressor (Calisi et al., 2018),  
476 though this response may differ when animals are in a parental state. Lastly, it is unclear why *PRLR*  
477 would be downregulated, ostensibly reducing prolactin responsiveness in the gonads. The gonadal  
478 response in *PRL* and *PRLR* could diverge because the two genes respond to different factors beyond  
479 prolactin, such as changes in other hormones or transcription factors that were affected during  
480 manipulation. These two genes do exhibit differential regulation in mammalian cells (Aoki et al., 2019;  
481 Featherstone et al., 2012), which if true in birds, could partially explain their opposing responses to chick

482 presence. Overall, the gonadal transcriptional response to offspring cues merits further study to  
483 understand its importance in parental behavior.

#### 484 *4.3 Sex differences in PRL and PRLR gene expression*

485 In almost all tissues examined, we uncovered consistent patterns of sex differences in *PRL* and  
486 *PRLR* gene expression. We found that females had higher levels of plasma prolactin and pituitary *PRL*  
487 expression than males, but males expressed higher levels of *PRLR* than females in all tissues. These sex  
488 differences are consistent with other studies in biparental birds, where females also had higher plasma  
489 prolactin than males (Hector & Goldsmith, 1985, Vleck 1998). In mammals, higher prolactin levels in  
490 females are explained by estrogen-responsive elements in the *PRL* gene promoter (Maurer and Notides,  
491 1987), though this mechanism remains unconfirmed in birds (Kurima et al., 1995). Interestingly, we  
492 found no significant sex differences in hypothalamic *PRL*, and gonadal *PRL* was more expressed in males  
493 than females. This result is consistent with the idea that gene regulation differs for extra-pituitary *PRL*  
494 compared to “dogmatic” pituitary *PRL*, which has been found in mammalian cell lines (Marano and Ben-  
495 Jonathan, 2014). Further studies are needed to determine whether autocrine extra-pituitary prolactin could  
496 compensate locally for sex differences in circulating prolactin of pituitary origin. Our finding that males  
497 had higher *PRLR* across all tissues differs from rodent studies, where *PRLR* expression or prolactin-  
498 binding is often lower in males than females in the brain (Cabrera-Reyes et al., 2015; Pi and Voogt, 2002;  
499 Salais-López et al., 2018). The mechanism by which male doves may upregulate *PRLR* remains unclear,  
500 though testosterone may play a possible role, as castration significantly reduces prolactin binding in the  
501 rat brain (Salais-López et al., 2018). Our findings highlight the need to study prolactin dynamics in both  
502 sexes, as most studies of *PRL/R* expression in birds to date only included one sex or did not compare sex  
503 differences (Buntin and Buntin, 2014; Chaiseha et al., 2012; Ramesh et al., 2000; Smiley et al., 2021,  
504 2020).

505 Together, our results support the hypothesis that different gene expression pathways can allow  
506 sexes to converge on a behavioral phenotype, preventing behavioral differences rather than promoting

507 them (De Vries, 2004). A compensatory mechanism appears to be at play in our study, where females  
508 produced more hormonal signal (prolactin), but males increased downstream tissue responsiveness to that  
509 signal (via *PRLR*). This compensation may allow the sexes to exhibit a similar suite of parental behaviors  
510 despite sex differences in circulating prolactin levels. Indeed, several other bird species also exhibit  
511 higher prolactin levels in females, but both sexes show similar parental behaviors (Angelier et al., 2007;  
512 Angelier and Chastel, 2009). Sex differences in brain and peripheral *PRLR* may explain how similar  
513 parental behaviors can be maintained despite sex-biased differences in circulating prolactin. While much  
514 focus is on sex differences in behaviors or hormone levels, our results highlight the need to examine  
515 underlying mechanisms that may allow the sexes to converge to a similar phenotype (McCarthy and  
516 Konkle, 2005). Examining hormone and receptor dynamics in both sexes will be important to determine if  
517 this pattern occurs in other biparental species.

## 518 **5. Conclusions**

519 In summary, we report dynamic expression of prolactin and its receptor in various tissues  
520 important for reproduction and parental care, including the HPG endocrine axis and the crop. By  
521 examining specific stages of reproduction and parental care, we show that subtle changes in tissue-  
522 specific gene expression may help coordinate the overall response to prolactin and transitions between  
523 parental phenotypes. We show that *PRL* and *PRLR* gene expression in key tissues like the hypothalamus  
524 and gonads can respond to offspring cues even when plasma prolactin levels remain unaffected. Our  
525 results emphasize the need to examine how target tissues and endocrine axes transcriptomically respond  
526 to changing offspring stimuli, even in the absence of hormonal changes. Lastly, we uncovered consistent  
527 sex differences in prolactin regulation across the HPG axis, suggesting a compensatory mechanism by  
528 which the sexes may converge on similar parental behaviors in a biparental system. Future studies will be  
529 required to determine how regulation of these genes differs across tissues and the sexes, including  
530 manipulations of hormones that may drive gene expression. Overall, this study shows that tissue- and sex-

531 specific changes in local production or responsiveness to a hormone can occur across an endocrine axis to  
532 coordinate physiological and behavioral breeding transitions.

### 533 **Acknowledgements**

534 We thank T.P. Hahn and D. Caillaud for their helpful comments on earlier versions of this  
535 project. C. Parenteau also provided invaluable help with prolactin radioimmunoassays. We also thank the  
536 numerous undergraduate members of the Calisi laboratory for their dedication to animal care and  
537 husbandry: M. Alvarez, T. Chen, H. Hudson, E. Krestoff, C. Nguyen, A. Martinez, I. Orellana Bonilla, J.  
538 Sahota, E. Saldana, and D. Sanpedro. This project was funded by NSF IOS 1455960 to RMC and MDM,  
539 and a University of California Davis Dean's Mentorship Award (2018) to BMNU and VSF. Comments  
540 from two anonymous reviewers greatly improved this manuscript.

541

542 **References**

- 543 Abs, M. (Ed.), 1983. Physiology and behaviour of the pigeon. Academic Press, London.
- 544 Anderson, G.M., Beijer, P., Bang, A.S., Fenwick, M.A., Bunn, S.J., Grattan, D.R., 2006. Suppression of  
545 Prolactin-Induced Signal Transducer and Activator of Transcription 5b Signaling and Induction  
546 of Suppressors of Cytokine Signaling Messenger Ribonucleic Acid in the Hypothalamic Arcuate  
547 Nucleus of the Rat during Late Pregnancy and Lactation. *Endocrinology* 147, 4996–5005.  
548 <https://doi.org/10.1210/en.2005-0755>
- 549 Angelier, F., Chastel, O., 2009. Stress, prolactin and parental investment in birds: A review. *Gen. Comp.*  
550 *Endocrinol.* 163, 142–148. <https://doi.org/10.1016/j.ygcen.2009.03.028>
- 551 Angelier, F., Parenteau, C., Ruault, S., Angelier, N., 2016a. Endocrine consequences of an acute stress  
552 under different thermal conditions: A study of corticosterone, prolactin, and thyroid hormones in  
553 the pigeon ( *Columbia livia* ). *Comp. Biochem. Physiol. A. Mol. Integr. Physiol.* 196, 38–45.  
554 <https://doi.org/10.1016/j.cbpa.2016.02.010>
- 555 Angelier, F., Weimerskirch, H., Dano, S., Chastel, O., 2007. Age, experience and reproductive  
556 performance in a long-lived bird: a hormonal perspective. *Behav. Ecol. Sociobiol.* 61, 611–621.  
557 <https://doi.org/10.1007/s00265-006-0290-1>
- 558 Angelier, F., Wingfield, J.C., Tartu, S., Chastel, O., 2016b. Does prolactin mediate parental and life-  
559 history decisions in response to environmental conditions in birds? A review. *Horm. Behav.* 77,  
560 18–29. <https://doi.org/10.1016/j.yhbeh.2015.07.014>
- 561 Aoki, M., Wartenberg, P., Grünewald, R., Phillipps, H.R., Wyatt, A., Grattan, D.R., Boehm, U., 2019.  
562 Widespread Cell-Specific Prolactin Receptor Expression in Multiple Murine Organs.  
563 *Endocrinology* 160, 2587–2599. <https://doi.org/10.1210/en.2019-00234>
- 564 Austin, S., Word, K.R., 2018. Prolactin, in: Vonk, J., Shackelford, T. (Eds.), *Encyclopedia of Animal*  
565 *Cognition and Behavior*. Springer.
- 566 Austin, S.H., Harris, R.M., Booth, A., Lang, A.S., Farrar, V.S., Krause, J.S., Hallman, T.A., MacManes,



- 567 M.D., Calisi, R.M., 2021a. Isolating the role of corticosterone in the hypothalamic-pituitary-  
568 gonadal transcriptomic stress response. *Front. Endocrinol.* 12.
- 569 Austin, S.H., Krause, J.S., Viernes, R., Farrar, V.S., Booth, A.M., Harris, R.M., Angelier, F., Lee, C.,  
570 Bond, A., Wingfield, J.C., MacManes, M.D., Calisi, R.M., 2021b. Uncovering the Sex-specific  
571 Endocrine Responses to Reproduction and Parental Care. *Front. Endocrinol.* In press.
- 572 Bachelot, A., Binart, N., 2007. Reproductive role of prolactin. *Reproduction* 133, 361–369.  
573 <https://doi.org/10.1530/REP-06-0299>
- 574 Ball, G.F., Balthazart, J., 2008. Individual variation and the endocrine regulation of behaviour and  
575 physiology in birds: a cellular/molecular perspective. *Philos. Trans. R. Soc. B Biol. Sci.* 363,  
576 1699–1710. <https://doi.org/10.1098/rstb.2007.0010>
- 577 Ben-Jonathan, N., Mershon, J.L., Allen, D.L., Steinmetz, R.W., 1996. Extrapituitary Prolactin:  
578 Distribution, Regulation, Functions, and Clinical Aspects\*. *Endocr. Rev.* 17, 639–669.  
579 <https://doi.org/10.1210/edrv-17-6-639>
- 580 Bera, T.K., Hwang, S., Swanson, S.M., Guzman, R.C., Edery, M., Nandi, S., 1994. In situ localization of  
581 prolactin receptor message in the mammary glands of pituitaryisografted mice. *Mol. Cell.*  
582 *Biochem.* 132, 145–149. <https://doi.org/10.1007/BF00926923>
- 583 Bray, N.L., Pimentel, H., Melsted, P., Pachter, L., 2016. Near-optimal probabilistic RNA-seq  
584 quantification. *Nat. Biotechnol.* 34, 525–527. <https://doi.org/10.1038/nbt.3519>
- 585 Bridges, R.S., 2015. Neuroendocrine regulation of maternal behavior. *Front. Neuroendocrinol.* 36, 178–  
586 196. <https://doi.org/10.1016/j.yfrne.2014.11.007>
- 587 Brown, R.S.E., Aoki, M., Ladyman, S.R., Phillipps, H.R., Wyatt, A., Boehm, U., Grattan, D.R., 2017.  
588 Prolactin action in the medial preoptic area is necessary for postpartum maternal nursing  
589 behavior. *Proc. Natl. Acad. Sci.* 114, 10779–10784. <https://doi.org/10.1073/pnas.1708025114>
- 590 Buntin, J., Becker, G.M., Ruzycski, E., 1991. Facilitation of parental behavior in ring doves by systemic or  
591 intracranial injections of prolactin. *Horm. Behav.* 25, 424–444. <https://doi.org/10.1016/0018->  
592 [506X\(91\)90012-7](https://doi.org/10.1016/0018-506X(91)90012-7)

- 593 Buntin, J.D., 1996. Neural and Hormonal Control of Parental Behavior in Birds, in: Advances in the  
594 Study of Behavior. Elsevier, pp. 161–213. [https://doi.org/10.1016/S0065-3454\(08\)60333-2](https://doi.org/10.1016/S0065-3454(08)60333-2)
- 595 Buntin, J.D., 1979. Prolactin release in parent ring doves after brief exposure to their young. J.  
596 Endocrinol. 82, 127–130. <https://doi.org/10.1677/joe.0.0820127>
- 597 Buntin, J.D., Buntin, L., 2014. Increased STAT5 signaling in the ring dove brain in response to prolactin  
598 administration and spontaneous elevations in prolactin during the breeding cycle. Gen. Comp.  
599 Endocrinol. 200, 1–9. <https://doi.org/10.1016/j.ygcen.2014.02.006>
- 600 Buntin, J.D., Ruzycki, E., 1987. Characteristics of prolactin binding sites in the brain of the ring dove  
601 (*Streptopelia risoria*). Gen. Comp. Endocrinol. 65, 243–253. [https://doi.org/10.1016/0016-](https://doi.org/10.1016/0016-6480(87)90172-9)  
602 [6480\(87\)90172-9](https://doi.org/10.1016/0016-6480(87)90172-9)
- 603 Buntin, J.D., Tesch, D., 1985. Effects of intracranial prolactin administration on maintenance of  
604 incubation readiness, ingestive behavior, and gonadal condition in ring doves. Horm. Behav. 19,  
605 188–203. [https://doi.org/10.1016/0018-506X\(85\)90018-2](https://doi.org/10.1016/0018-506X(85)90018-2)
- 606 Buntin, J.D., Walsh, R.J., 1988. In vivo autoradiographic analysis of prolactin binding in brain and  
607 choroid plexus of the domestic ring dove. Cell Tissue Res. 251, 105–109.  
608 <https://doi.org/10.1007/BF00215453>
- 609 Cabrera-Reyes, E.A., Vergara-Castañeda, E., Rivero-Segura, N.A., Cerbón, M., 2015. Sex differences in  
610 prolactin and its receptor expression in pituitary, hypothalamus and hippocampus of the rat. Rev.  
611 Mex. Endocrinol. Metab. Nutr. 2, 60–67.
- 612 Calisi, R.M., Austin, S.H., Lang, A.S., MacManes, M.D., 2018. Sex-biased transcriptomic response of the  
613 reproductive axis to stress. Horm. Behav. 100, 56–68.  
614 <https://doi.org/10.1016/j.yhbeh.2017.11.011>
- 615 Camper, P.M., Burke, W.H., 1977. The Effect of Prolactin on Reproductive Function in Female Japanese  
616 Quail (*Coturnix coturnix japonica*). Poult. Sci. 56, 1130–1134.  
617 <https://doi.org/10.3382/ps.0561130>
- 618 Chaiseha, Y., Ngernsoungnern, P., Sartsoongnoen, N., Prakobsaeng, N., El Halawani, M.E., 2012.

- 619 Presence of prolactin mRNA in extra-pituitary brain areas in the domestic turkey. *Acta*  
620 *Histochem.* 114, 116–121. <https://doi.org/10.1016/j.acthis.2011.03.007>
- 621 Champagne, F.A., Curley, J.P., 2012. Genetics and epigenetics of parental care, in: Royle, N.J., Smiseth,  
622 P.T. (Eds.), *The Evolution of Parental Care*. Oxford University Press, pp. 304–324.
- 623 Chen, C.-C., Stairs, D.B., Boxer, R.B., Belka, G.K., Horseman, N.D., Alvarez, J.V., Chodosh, L.A., 2012.  
624 Autocrine prolactin induced by the Pten-Akt pathway is required for lactation initiation and  
625 provides a direct link between the Akt and Stat5 pathways. *Genes Dev.* 26, 2154–2168.  
626 <https://doi.org/10.1101/gad.197343.112>
- 627 Cheng, M., Balthazart, J., 1982. The role of nest-building activity in gonadotropin secretions and the  
628 reproductive success of ring doves (*Streptopelia risoria*). *J. Comp. Physiol. Psychol.* 96, 307–324.  
629 <https://doi.org/10.1037/h0077875>
- 630 Cheng, M.-F., Burke, W.H., 1983. Serum prolactin levels and crop-sac development in ring doves during  
631 a breeding cycle. *Horm. Behav.* 17, 54–65. [https://doi.org/10.1016/0018-506X\(83\)90015-6](https://doi.org/10.1016/0018-506X(83)90015-6)
- 632 Cloues, R., Ramos, C., Silver, R., 1990. Vasoactive intestinal polypeptide-like immunoreactivity during  
633 reproduction in doves: influence of experience and number of offspring. *Horm. Behav.* 24, 215–  
634 31.
- 635 De Vries, G.J., 2004. Minireview: Sex Differences in Adult and Developing Brains: Compensation,  
636 Compensation, Compensation. *Endocrinology* 145, 1063–1068. <https://doi.org/10.1210/en.2003-1504>
- 638 DeVito, W.J., 1988. Distribution of Immunoreactive Prolactin in the Male and Female Rat Brain: Effects  
639 of Hypophysectomy and Intraventricular Administration of Colchicine. *Neuroendocrinology* 47,  
640 284–289. <https://doi.org/10.1159/000124926>
- 641 Dobolyi, A., Grattan, D.R., Stolzenberg, D.S., 2014. Preoptic Inputs and Mechanisms that Regulate  
642 Maternal Responsiveness. *J. Neuroendocrinol.* 26, 627–640. <https://doi.org/10.1111/jne.12185>
- 643 Dong, X.Y., Zhang, M., Jia, Y.X., Zou, X.T., 2012. Physiological and hormonal aspects in female  
644 domestic pigeons (*Columba livia*) associated with breeding stage and experience: Pigeon

- 645 physiological and hormonal changes. *J. Anim. Physiol. Anim. Nutr.* no-no.
- 646 <https://doi.org/10.1111/j.1439-0396.2012.01331.x>
- 647 El Halawani, M.E., Silsby, J.L., Behnke, E.J., Fehrer, S.C., 1986. Hormonal Induction of Incubation
- 648 Behavior in Ovariectomized Female Turkeys (*Meleagris Gallopavo*). *Biol. Reprod.* 35, 59–67.
- 649 <https://doi.org/10.1095/biolreprod35.1.59>
- 650 Featherstone, K., White, M.R.H., Davis, J.R.E., 2012. The Prolactin Gene: A Paradigm of
- 651 Tissue-Specific Gene Regulation with Complex Temporal Transcription Dynamics. *J.*
- 652 *Neuroendocrinol.* 24, 977–990. <https://doi.org/10.1111/j.1365-2826.2012.02310.x>
- 653 Feder, H.H., Storey, A., Goodwin, D., Reboulleau, C., Silver, R., 1977. Testosterone and “5 $\alpha$ -
- 654 Dihydrotestosterone” Levels in Peripheral Plasma of Male and Female Ring Doves (*Streptopelia*
- 655 *risoria*) During the Reproductive Cycle<sup>1</sup>. *Biol. Reprod.* 16, 666–677.
- 656 <https://doi.org/10.1095/biolreprod16.5.666>
- 657 Ferraris, J., Boutillon, F., Bernadet, M., Seilicovich, A., Goffin, V., Pisera, D., 2012. Prolactin receptor
- 658 antagonism in mouse anterior pituitary: effects on cell turnover and prolactin receptor expression.
- 659 *Am. J. Physiol.-Endocrinol. Metab.* 302, E356–E364.
- 660 <https://doi.org/10.1152/ajpendo.00333.2011>
- 661 Freeman, M.E., Kanyicska, B., Lerant, A., Nagy, G., 2000. Prolactin: Structure, Function, and Regulation
- 662 of Secretion. *Physiol. Rev.* 80, 1523–1631. <https://doi.org/10.1152/physrev.2000.80.4.1523>
- 663 Gillespie, M.J., Crowley, T.M., Haring, V.R., Wilson, S.L., Harper, J.A., Payne, J.S., Green, D.,
- 664 Monaghan, P., Donald, J.A., Nicholas, K.R., Moore, R.J., 2013. Transcriptome analysis of pigeon
- 665 milk production – role of cornification and triglyceride synthesis genes. *BMC Genomics* 14, 169.
- 666 <https://doi.org/10.1186/1471-2164-14-169>
- 667 Gill-Sharma, M.K., 2009. Prolactin and Male Fertility: The Long and Short Feedback Regulation. *Int. J.*
- 668 *Endocrinol.* 2009, 1–13. <https://doi.org/10.1155/2009/687259>
- 669 Grattan, D.R., 2018. Coordination or Coincidence? The Relationship between Prolactin and Gonadotropin
- 670 Secretion. *Trends Endocrinol. Metab.* 29, 3–5. <https://doi.org/10.1016/j.tem.2017.11.004>

- 671 Grattan, D.R., Jasoni, C.L., Liu, X., Anderson, G.M., Herbison, A.E., 2007. Prolactin Regulation of  
672 Gonadotropin-Releasing Hormone Neurons to Suppress Luteinizing Hormone Secretion in Mice.  
673 *Endocrinology* 148, 4344–4351. <https://doi.org/10.1210/en.2007-0403>
- 674 Grattan, D.R., Le Tissier, P., 2015. Hypothalamic control of prolactin secretion, and the multiple  
675 reproductive functions of prolactin, in: Plant, T.M., Zeleznik, A.J., Knobil, E., Neil, J.D. (Eds.),  
676 Knobil and Neill's Physiology of Reproduction. Elsevier/Academic Press, Amsterdam, pp. 469–  
677 526.
- 678 Guillaumot, P., Benahmed, M., 1999. Prolactin receptors are expressed and hormonally regulated in rat  
679 Sertoli cells. *Mol. Cell. Endocrinol.* 149, 163–168. [https://doi.org/10.1016/S0303-](https://doi.org/10.1016/S0303-7207(98)00246-9)  
680 [7207\(98\)00246-9](https://doi.org/10.1016/S0303-7207(98)00246-9)
- 681 Hansen, E.W., 1966. Squab-induced crop growth in ring dove foster parents. *J. Comp. Physiol. Psychol.*  
682 62, 120–122. <https://doi.org/10.1037/h0023477>
- 683 Hennighausen, L., Robinson, G.W., Wagner, K.-U., Liu, X., 1997. Prolactin Signaling in Mammary  
684 Gland Development. *J. Biol. Chem.* 272, 7567–7569. <https://doi.org/10.1074/jbc.272.12.7567>
- 685 Hope, S.F., DuRant, S.E., Angelier, F., Hallagan, J.J., Moore, I.T., Parenteau, C., Kennamer, R.A.,  
686 Hopkins, W.A., 2020. Prolactin is related to incubation constancy and egg temperature following  
687 a disturbance in a precocial bird. *Gen. Comp. Endocrinol.* 295, 113489.  
688 <https://doi.org/10.1016/j.ygcen.2020.113489>
- 689 Horseman, N.D., Buntin, J.D., 1995. Regulation of Pigeon Cropmilk Secretion and Parental Behaviors by  
690 Prolactin. *Annu. Rev. Nutr.* 15, 213–238. <https://doi.org/10.1146/annurev.nu.15.070195.001241>
- 691 Hu, S., Duggavathi, R., Zadworny, D., 2017. Regulatory Mechanisms Underlying the Expression of  
692 Prolactin Receptor in Chicken Granulosa Cells. *PLOS ONE* 12, e0170409.  
693 <https://doi.org/10.1371/journal.pone.0170409>
- 694 Hutchison, R.E., 1975. EFFECTS OF OVARIAN STEROIDS AND PROLACTIN ON THE  
695 SEQUENTIAL DEVELOPMENT OF NESTING BEHAVIOUR IN FEMALE BUDGERIGARS.  
696 *J. Endocrinol.* 67, 29–39. <https://doi.org/10.1677/joe.0.0670029>

- 697 Ketterson, E.D., Atwell, J.W., McGlothlin, J.W., 2009. Phenotypic integration and independence:  
698 Hormones, performance, and response to environmental change. *Integr. Comp. Biol.* 49, 365–  
699 379. <https://doi.org/10.1093/icb/icp057>
- 700 Kurima, K., Proudman, J.A., El Halawani, M.E., Wong, E.A., 1995. The turkey prolactin-encoding gene  
701 and its regulatory region. *Gene* 156, 309–310. [https://doi.org/10.1016/0378-1119\(95\)00032-2](https://doi.org/10.1016/0378-1119(95)00032-2)
- 702 Lea, R.W., Vowles, D.M., 1985. The control of prolactin secretion and nest defence in the ring dove (  
703 *Streptopelia risoria*). *Bolletino Zool.* 52, 323–329. <https://doi.org/10.1080/11250008509440534>
- 704 Lea, R.W., Vowles, D.M., Dick, H.R., 1986. Factors affecting prolactin secretion during the breeding  
705 cycle of the ring dove (*Streptopelia risoria*) and its possible role in incubation. *J. Endocrinol.* 110,  
706 447–458. <https://doi.org/10.1677/joe.0.1100447>
- 707 Livak, K.J., Schmittgen, T.D., 2001. Analysis of Relative Gene Expression Data Using Real-Time  
708 Quantitative PCR and the  $2^{-\Delta\Delta CT}$  Method. *Methods* 25, 402–408.  
709 <https://doi.org/10.1006/meth.2001.1262>
- 710 Lopez-Vicchi, F., Ladyman, S.R., Ornstein, A.M., Gustafson, P., Knowles, P., Luque, G.M., Grattan,  
711 D.R., Becu-Villalobos, D., 2020. Chronic high prolactin levels impact on gene expression at  
712 discrete hypothalamic nuclei involved in food intake. *FASEB J.* 34, 3902–3914.  
713 <https://doi.org/10.1096/fj.201902357R>
- 714 Love, M.I., Huber, W., Anders, S., 2014. Moderated estimation of fold change and dispersion for RNA-  
715 seq data with DESeq2. *Genome Biol.* 15, 550. <https://doi.org/10.1186/s13059-014-0550-8>
- 716 MacManes, M.D., Austin, S.H., Lang, A.S., Booth, A., Farrar, V., Calisi, R.M., 2017. Widespread  
717 patterns of sexually dimorphic gene expression in an avian hypothalamic–pituitary–gonadal  
718 (HPG) axis. *Sci. Rep.* 7, 45125. <https://doi.org/10.1038/srep45125>
- 719 Macnamee, M.C., Sharp, P.J., Lea, R.W., Sterling, R.J., Harvey, S., 1986. Evidence that vasoactive  
720 intestinal polypeptide is a physiological prolactin-releasing factor in the bantam hen. *Gen. Comp.*  
721 *Endocrinol.* 62, 470–478. [https://doi.org/10.1016/0016-6480\(86\)90057-2](https://doi.org/10.1016/0016-6480(86)90057-2)
- 722 Marano, R.J., Ben-Jonathan, N., 2014. Minireview: Extrapituitary Prolactin: An Update on the

- 723 Distribution, Regulation, and Functions. *Mol. Endocrinol.* 28, 622–633.
- 724 <https://doi.org/10.1210/me.2013-1349>
- 725 Maurer, R.A., Notides, A.C., 1987. Identification of an estrogen-responsive element from the 5'-flanking  
726 region of the rat prolactin gene. *Mol. Cell. Biol.* 7, 4247–4254.
- 727 <https://doi.org/10.1128/MCB.7.12.4247>
- 728 McCarthy, M.M., Konkle, A.T.M., 2005. When is a sex difference not a sex difference? *Front.*  
729 *Neuroendocrinol.* 26, 85–102. <https://doi.org/10.1016/j.yfrne.2005.06.001>
- 730 Meier, A.H., 1969. Antigonadal effects of prolactin in the White-throated Sparrow (*Zonotrichia*  
731 *albicollis*). *Gen. Comp. Endocrinol.* 13, 222–225.
- 732 Meier, A.H., Martin, D.D., MacGregor, R., 1971. Temporal synergism of corticosterone and prolactin  
733 controlling gonadal growth in sparrows. *Science* 173, 1240–1242.
- 734 Michel, G.F., 1977. Experience and progesterone in ring dove incubation. *Anim. Behav.* 25, 281–285.  
735 [https://doi.org/10.1016/0003-3472\(77\)90003-3](https://doi.org/10.1016/0003-3472(77)90003-3)
- 736 Moul, P.J., Besser, G., 1981. Prolactin and gonad function. *IPPF Med Bull* 15, 3–4.
- 737 Nagano, M., Kelly, P., 1999. Tissue distribution and regulation of rat prolactin receptor gene expression.  
738 Quantitative analysis by polymerase chain reaction. *J. Biol. Chem.* 269, 13337–45.
- 739 Pi, X., Voogt, J.L., 2002. Sex difference and estrous cycle: expression of prolactin receptor mRNA in rat  
740 brain. *Mol. Brain Res.* 103, 130–139. [https://doi.org/10.1016/S0169-328X\(02\)00194-8](https://doi.org/10.1016/S0169-328X(02)00194-8)
- 741 Pitts, G.R., Youngren, O.M., Silsby, J.L., Rozenboim, I., Chaiseha, Y., Phillips, R.E., Foster, D.N., El  
742 Halawani, M.E., 1994. Role of Vasoactive Intestinal Peptide in the Control of Prolactin-Induced  
743 Turkey Incubation Behavior. II. Chronic Infusion of Vasoactive Intestinal Peptide1. *Biol. Reprod.*  
744 50, 1350–1356. <https://doi.org/10.1095/biolreprod50.6.1350>
- 745 Ramesh, R., Kuenzel, W.J., Buntin, J.D., Proudman, J.A., 2000. Identification of growth-hormone and  
746 prolactin-containing neurons within the avian brain. *Cell Tissue Res.* 299, 317–383.  
747 <https://doi.org/10.1007/s004419900104>
- 748 Ramsey, S.M., Goldsmith, A.R., Silver, R., 1985. Stimulus requirements for prolactin and LH secretion in

- 749 incubating ring doves. *Gen. Comp. Endocrinol.* 59, 246–256. <https://doi.org/10.1016/0016->  
750 6480(85)90376-4
- 751 Reddy, I.J., David, C.G., Sarma, P.V., Singh, K., 2002. The possible role of prolactin in laying  
752 performance and steroid hormone secretion in domestic hen (*Gallus domesticus*). *Gen. Comp.*  
753 *Endocrinol.* 127, 249–255. [https://doi.org/10.1016/S0016-6480\(02\)00034-5](https://doi.org/10.1016/S0016-6480(02)00034-5)
- 754 Riddle, O., Braucher, P.F., 1931. Studies on the Physiology of Reproduction in Birds: XXX. Control of  
755 the Special Secretion of the Crop-Gland in Pigeons by an Anterior Pituitary Hormone. *Am. J.*  
756 *Physiol.-Leg. Content* 97, 617–625. <https://doi.org/10.1152/ajplegacy.1931.97.4.617>
- 757 Rozenboim, I., Tabibzadeh, C., Silsby, J.L., El Halawani, M.E., 1993. Effect of Ovine Prolactin  
758 Administration on Hypothalamic Vasoactive Intestinal Peptide (VIP), Gonadotropin Releasing  
759 Hormone I and II Content, and Anterior Pituitary VIP Receptors in Laying Turkey Hens<sup>1</sup>. *Biol.*  
760 *Reprod.* 48, 1246–1250. <https://doi.org/10.1095/biolreprod48.6.1246>
- 761 Salais-López, H., Agustín-Pavón, C., Lanuza, E., Martínez-García, F., 2018. The maternal hormone in the  
762 male brain: Sexually dimorphic distribution of prolactin signalling in the mouse brain. *PLOS*  
763 *ONE* 13, e0208960. <https://doi.org/10.1371/journal.pone.0208960>
- 764 Shani, J., Barkey, R.J., Amit, T., 1981. Endogenous Prolactin Maintains its own Binding Sites in the  
765 Pigeon Crop Sac Mucosa. *J. Recept. Res.* 2, 407–417.  
766 <https://doi.org/10.3109/107998981809038875>
- 767 Silver, R., 1978. The Parental Behavior of Ring Doves: The intricately coordinated behavior of the male  
768 and female is based on distinct physiological mechanisms in the sexes. *Am. Sci.* 66, 209–215.
- 769 Sjoeholm, A., Bridges, R.S., Grattan, D.R., Anderson, G.M., 2011. Region-, Neuron-, and Signaling  
770 Pathway-Specific Increases in Prolactin Responsiveness in Reproductively Experienced Female  
771 Rats. *Endocrinology* 152, 1979–1988. <https://doi.org/10.1210/en.2010-1220>
- 772 Slawski, B.A., Buntin, J.D., 1995. Preoptic area lesions disrupt prolactin-induced parental feeding  
773 behavior in ring doves. *Horm. Behav.* 29, 248–266.
- 774 Smiley, K.O., 2019. Prolactin and avian parental care: New insights and unanswered questions. *Horm.*



- 775 Behav. <https://doi.org/10.1016/j.yhbeh.2019.02.012>
- 776 Smiley, K.O., Buntin, J.D., Corbitt, C., Deviche, P., 2020. Central prolactin binding site densities change  
777 seasonally in an adult male passerine bird (*Junco hyemalis*). *J. Chem. Neuroanat.* 106, 101786.  
778 <https://doi.org/10.1016/j.jchemneu.2020.101786>
- 779 Smiley, K.O., Dong, L., Ramakrishnan, S., Adkins-Regan, E., 2021. Central prolactin receptor  
780 distribution and pSTAT5 activation patterns in breeding and non-breeding zebra finches  
781 (*Taeniopygia guttata*). *Gen. Comp. Endocrinol.* 301, 113657.  
782 <https://doi.org/10.1016/j.ygcen.2020.113657>
- 783 Sockman, K.W., Schwabl, H., Sharp, P.J., 2000. The Role of Prolactin in the Regulation of Clutch Size  
784 and Onset of Incubation Behavior in the American Kestrel. *Horm. Behav.* 38, 168–176.  
785 <https://doi.org/10.1006/hbeh.2000.1616>
- 786 Soneson, C., Love, M.I., Robinson, M.D., 2016. Differential analyses for RNA-seq: transcript-level  
787 estimates improve gene-level inferences. *F1000Research* 4, 1521.  
788 <https://doi.org/10.12688/f1000research.7563.2>
- 789 Stiver, K.A., Alonzo, S.H., 2009. Parental and Mating Effort: Is There Necessarily a Trade-Off? *Ethology*  
790 115, 1101–1126. <https://doi.org/10.1111/j.1439-0310.2009.01707.x>
- 791 Swaminathan, G., Varghese, B., Fuchs, S.Y., 2008. Regulation of Prolactin Receptor Levels and Activity  
792 in Breast Cancer. *J. Mammary Gland Biol. Neoplasia* 13, 81–91. [https://doi.org/10.1007/s10911-](https://doi.org/10.1007/s10911-008-9068-6)  
793 [008-9068-6](https://doi.org/10.1007/s10911-008-9068-6)
- 794 Torner, L., Maloumy, R., Nava, G., Aranda, J., Clapp, C., Neumann, I.D., 2004. In vivo release and gene  
795 upregulation of brain prolactin in response to physiological stimuli. *Eur. J. Neurosci.* 19, 1601–  
796 1608. <https://doi.org/10.1111/j.1460-9568.2004.03264.x>
- 797 Torner, L., Toschi, N., Nava, G., Clapp, C., Neumann, I.D., 2002. Increased hypothalamic expression of  
798 prolactin in lactation: involvement in behavioural and neuroendocrine stress responses: Prolactin  
799 modulates stress responses during lactation. *Eur. J. Neurosci.* 15, 1381–1389.  
800 <https://doi.org/10.1046/j.1460-9568.2002.01965.x>

- 801 Vleck, C.M., Patrick, D.J., 1999. Effects of Vasoactive Intestinal Peptide on Prolactin Secretion in Three  
802 Species of Passerine Birds. *Gen. Comp. Endocrinol.* 113, 146–154.  
803 <https://doi.org/10.1006/gcen.1998.7191>
- 804 Zera, A.J., Harshman, L.G., 2001. The Physiology of Life History Trade-Offs in Animals. *Annu. Rev.*  
805 *Ecol. Syst.* 32, 95–126. <https://doi.org/10.1146/annurev.ecolsys.32.081501.114006>
- 806 Zhou, J.F., Zadworny, D., Gueméné, D., Kuhnlein, U., 1996. Molecular Cloning, Tissue Distribution, and  
807 Expression of the Prolactin Receptor during Various Reproductive States in *Meleagris gallopavo*  
808 1. *Biol. Reprod.* 55, 1081–1090. <https://doi.org/10.1095/biolreprod55.5.1081>
- 809 Zinzow-Kramer, W.M., Horton, B.M., Maney, D.L., 2014. Evaluation of reference genes for quantitative  
810 real-time PCR in the brain, pituitary, and gonads of songbirds. *Horm. Behav.* 66, 267–275.  
811 <https://doi.org/10.1016/j.yhbeh.2014.04.011>
- 812

813 **Figures**

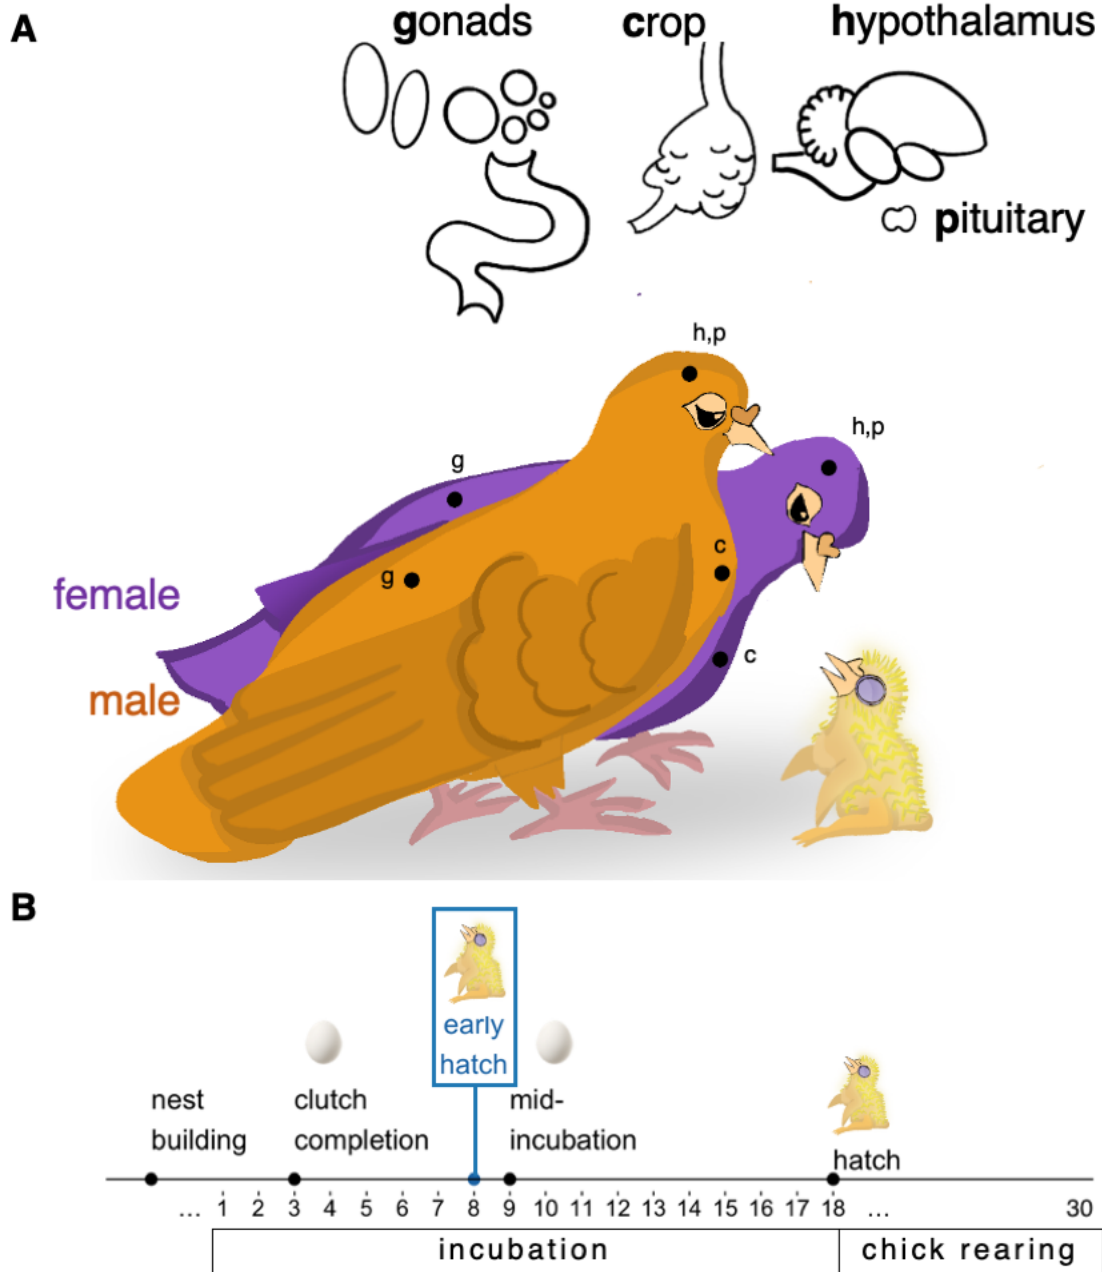

815 **Figure 1. Schematic diagram of experimental design.** (A) Tissues sampled in both males and females  
816 include the hypothalamus, pituitary, gonads (testes in males, ovaries and oviduct in females), and crop.  
817 Relative locations of each tissue are shown on the diagram with lowercase letters representing each tissue.  
818 (B) These tissues were collected from breeding pairs at the following stages of the rock dove  
819 reproduction: **nest building**, where pairs were engaged in nest building behaviors but had not yet laid an  
820 egg; **clutch completion** (incubation day 3), three days after the first egg was laid and the onset of  
821 incubation, when the second egg is laid (completing the two-egg clutch; this population of rock doves had  
822 a one day gap between laying the 1st and 2nd eggs); **mid-incubation** (incubation day 9), nine days after  
823 the first egg was laid and the onset of incubation; **hatch**, the day of the first chick hatching; and **early**  
824 **hatch**, a manipulation group where eggs were removed on the eighth day of incubation and replaced with  
825 a young chick(s) to test the impact of external cues (offspring presence) on gene expression and  
826 circulating prolactin concentration.  
827

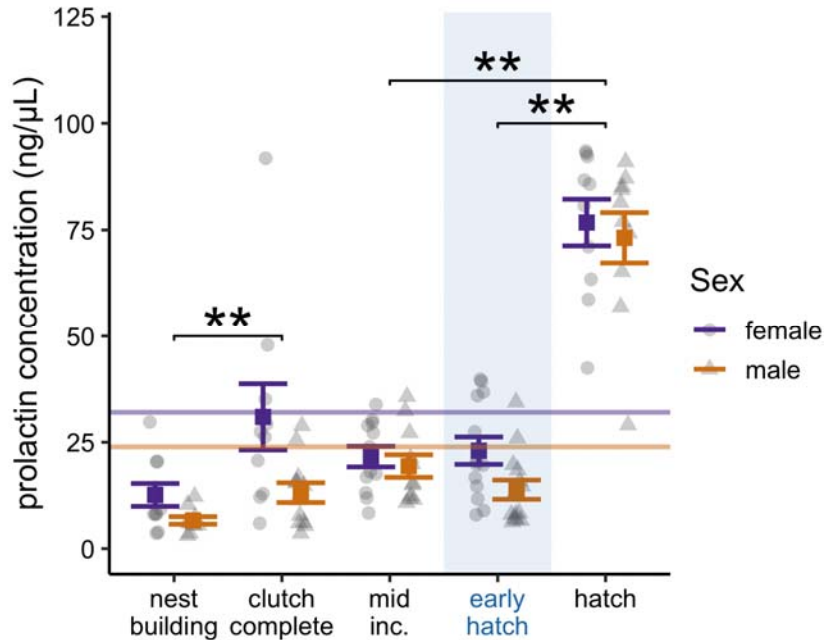

828

829 **Figure 2. Plasma prolactin across reproductive stages.** Prolactin plasma concentrations (ng/mL) of

830 each stage for females (purple, triangles) and males (orange, circles). Means and standard errors are

831 shown for each stage and sex. The mean value for each sex is shown as a horizontal line. Significant

832 pairwise comparisons between stages are indicated (\*\*  $p < 0.01$ ; for a full list of *a priori* defined

833 comparisons, see [Table 1](#)). Plasma prolactin data were originally presented in Austin et al., *in review*.

834

835

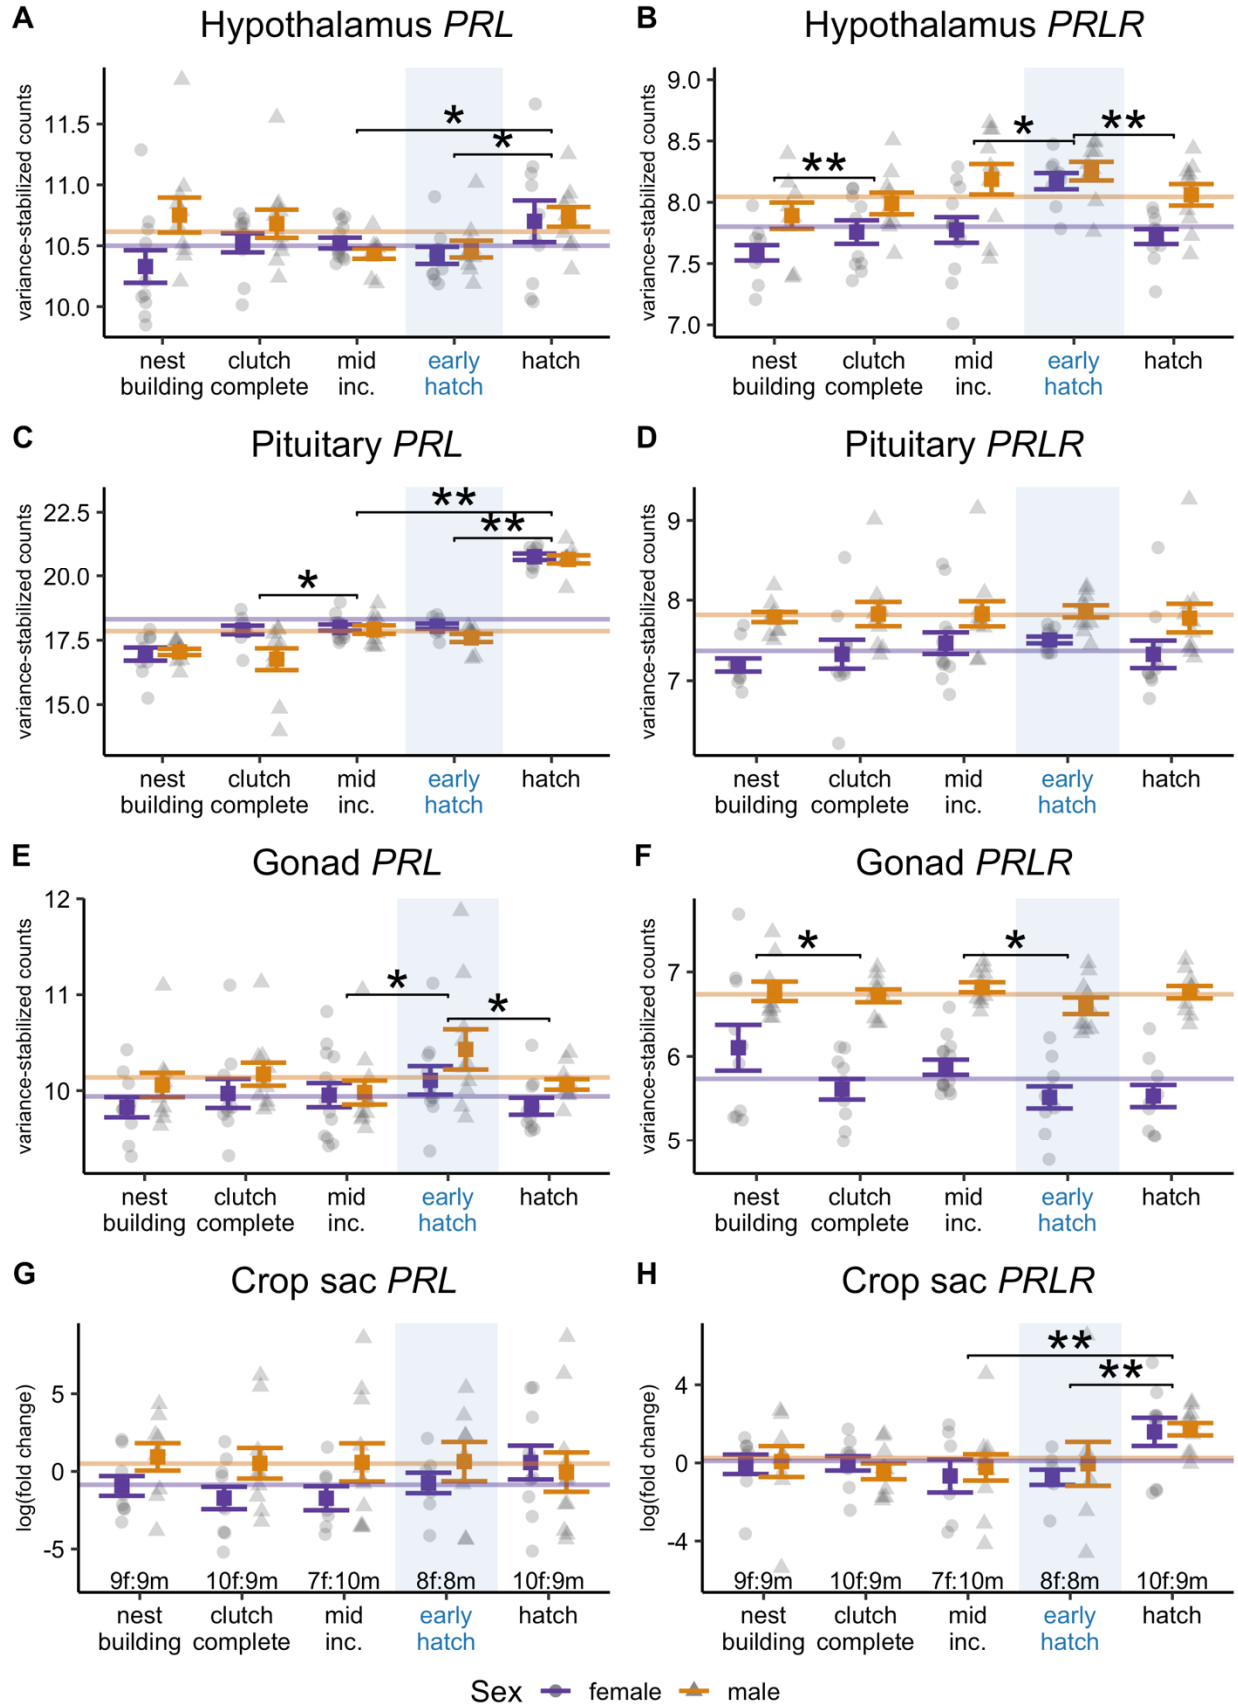

837 **Figure 3. *PRL* and *PRLR* gene expression across tissues.** *PRL* (left) and *PRLR* (right) expression,  
838 respectively, in the (A-B) hypothalamus, (C-D) pituitary, (E-F) gonads (testes and ovaries /oviducts), and  
839 (G-H) crop across reproductive stages. Early hatch, a manipulation group where we added chick(s) at  
840 mid-incubation, is highlighted in blue. Male (orange, triangles) and female (purple, circles) means and  
841 standard errors of the gene count mean (SEM) for each stage. The mean value for each sex is shown as a  
842 horizontal line. Significant pairwise comparisons between stages are indicated (\*  $p < 0.05$ , \*\*  $p < 0.01$ ;  
843 for a full list of *a priori* contrasts, see Table 1).

844

845

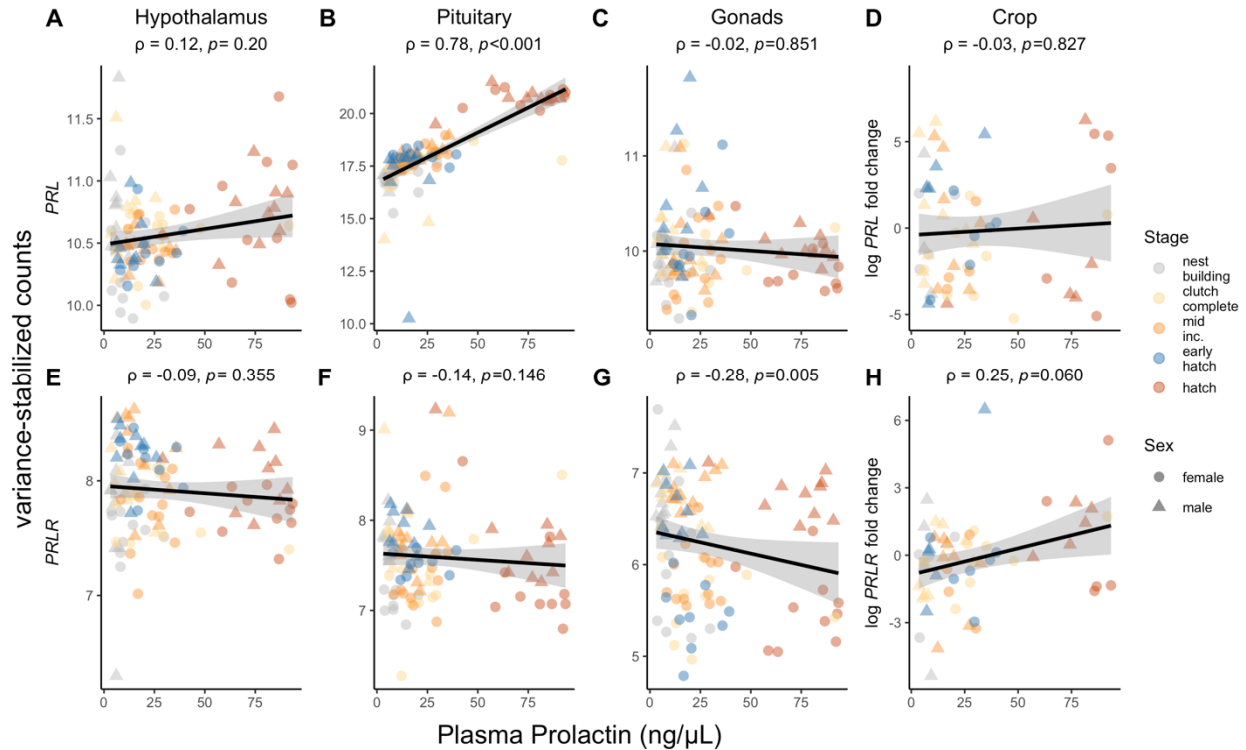

846

847 **Figure 4. Correlations between plasma prolactin concentrations and gene expression across tissues.**

848 Correlations between plasma prolactin (as measured by RIA) and gene expression of (A) hypothalamic

849 *PRL*, (B) pituitary *PRL*, (C) gonadal *PRL*, (D) crop *PRL*, (E) hypothalamic *PRLR*, (F) pituitary *PRLR*,

850 (G) gonad *PRL*, and (H) crop *PRLR* for each individual bird. Spearman's correlation coefficient ( $\rho$ ) and

851 *p*-values are shown for each gene-tissue combination. Gray shading around the line of best fit represents

852 the 95% confidence interval. Point color corresponds to reproductive stage, and males and females are

853 indicated with circles and triangles, respectively.

854



| Contrasts                                               | Circulating Prolactin              | PRL                               |                                   |                                  |                                  | PRLR                             |                                  |                                   |                                   |
|---------------------------------------------------------|------------------------------------|-----------------------------------|-----------------------------------|----------------------------------|----------------------------------|----------------------------------|----------------------------------|-----------------------------------|-----------------------------------|
|                                                         |                                    | Hypothalamus                      | Pituitary                         | Gonads                           | Crop                             | Hypothalamus                     | Pituitary                        | Gonads                            | Crop                              |
| <b>COMPARISONS BY STAGE</b>                             |                                    |                                   |                                   |                                  |                                  |                                  |                                  |                                   |                                   |
| <b>Reproductive stages compared with adjacent stage</b> |                                    |                                   |                                   |                                  |                                  |                                  |                                  |                                   |                                   |
| Clutch completion – nest building                       | 11.94 ± 3.99,<br><i>p</i> = 0.003  | n.s.                              | n.s.                              | n.s.                             | n.s.                             | 0.21 ± 0.10,<br><i>p</i> = 0.040 | n.s.                             | -0.27 ± 0.13,<br><i>p</i> = 0.040 | n.s.                              |
| Mid-incubation – clutch completion                      | n.s.                               | n.s.                              | 0.61 ± 0.30,<br><i>p</i> = 0.043  | n.s.                             | n.s.                             | n.s.                             | n.s.                             | n.s.                              | n.s.                              |
| Hatch – mid-incubation                                  | 54.57 ± 3.95,<br><i>p</i> < 0.001  | 0.23 ± 0.10,<br><i>p</i> = 0.026  | 2.79 ± 0.30,<br><i>p</i> < 0.001  | n.s.                             | n.s.                             | n.s.                             | n.s.                             | n.s.                              | 2.08 ± 0.61,<br><i>p</i> < 0.001  |
| <b>Manipulation group compared with controls</b>        |                                    |                                   |                                   |                                  |                                  |                                  |                                  |                                   |                                   |
| Early hatch – mid-incubation                            | n.s.                               | n.s.                              | n.s.                              | 0.29 ± 0.13,<br><i>p</i> = 0.022 | n.s.                             | 0.24 ± 0.10,<br><i>p</i> = 0.019 | n.s.                             | -0.29 ± 0.12,<br><i>p</i> = 0.02  | n.s.                              |
| Early hatch – hatch                                     | -56.55 ± 3.81,<br><i>p</i> < 0.001 | -0.27 ± 0.10,<br><i>p</i> = 0.011 | -3.28 ± 0.31,<br><i>p</i> < 0.001 | 0.32 ± 0.13,<br><i>p</i> = 0.018 | n.s.                             | 0.32 ± 0.10,<br><i>p</i> = 0.002 | n.s.                             | n.s.                              | -2.05 ± 0.63,<br><i>p</i> = 0.002 |
| <b>COMPARISONS BY SEX</b>                               |                                    |                                   |                                   |                                  |                                  |                                  |                                  |                                   |                                   |
| Males - females                                         | -7.86 ± 2.44,<br><i>p</i> = 0.002  | n.s.                              | -0.47 ± 0.19,<br><i>p</i> = 0.016 | 0.20 ± 0.08,<br><i>p</i> = 0.019 | 1.38 ± 0.65,<br><i>p</i> = 0.036 | 0.22 ± 0.07,<br><i>p</i> = 0.001 | 0.44 ± 0.09,<br><i>p</i> < 0.001 | 1.00 ± 0.08,<br><i>p</i> < 0.001  | n.s.                              |

855

856 **Table 1. Pairwise contrasts for circulating prolactin, and PRL and PRLR within each tissue.** Using *a*  
857 *priori* hypotheses, we developed contrasts to compare relevant transitions during parental care. We  
858 compared adjacent stages of reproduction and then compared the early hatch manipulation group with its  
859 equivalent control at mid-incubation and with concentration (circulating prolactin) /gene counts (*PRL* and  
860 *PRLR*) typically seen at natural hatch after 18 days of incubation. We also compared values between the  
861 sexes. Estimates ± standard errors are presented as A - B, where the estimate is group A minus group B.  
862 Only contrasts with *p*-values < 0.05 are shown. Comparisons where values increased in A relative to B  
863 are highlighted in yellow, where those where values decreased are in blue. For sex differences, purple  
864 indicates when values are higher in females and orange when values are higher in males.

| Stage                                                          | Sex | HPG RNAseq data (n) | Crop (total) (n) | Crops without associated RNAseq data (n) |
|----------------------------------------------------------------|-----|---------------------|------------------|------------------------------------------|
| Nest building                                                  | F   | 10                  | 10               | 4                                        |
|                                                                | M   | 10                  | 8                | 4                                        |
| Clutch completion<br>(incubation day 3)                        | F   | 10                  | 10               | 1                                        |
|                                                                | M   | 10                  | 9                | 0                                        |
| Mid-incubation<br>(incubation day 9)                           | F   | 12                  | 9                | 0                                        |
|                                                                | M   | 10                  | 10               | 2                                        |
| Early Hatch manipulation<br>(manipulation on incubation day 8) | F   | 10                  | 8                | 0                                        |
|                                                                | M   | 10                  | 8                | 0                                        |
| Hatching                                                       | F   | 10                  | 10               | 4                                        |
|                                                                | M   | 10                  | 11               | 5                                        |

865

866 **Supplemental Table 1. Sample sizes for tissues by stage and sex.** Total sample sizes (n) are shown for  
867 the HPG RNAseq data (all individuals included had gene count data for all three tissues, the  
868 hypothalamus, pituitary and gonads). Total crop sample sizes are shown by stage and sex. The majority of  
869 crops came from individuals who also had HPG RNAseq data, except for 20 additional individuals that  
870 were included to increase crop sample size. The number of additional crops that were collected separately  
871 from the RNAseq study are shown in the right column.

872

| <b>Gene</b>                          | <b>NCBI Accession Number</b> | <b>Amplicon length (base pairs)</b> | <b>Efficiency (%)</b> | <b>Primer sequence (Forward and Reverse primers)</b>                        |
|--------------------------------------|------------------------------|-------------------------------------|-----------------------|-----------------------------------------------------------------------------|
| Prolactin receptor ( <i>PRLR</i> )   | NM_001282822.1               | 158                                 | 95.2                  | <b>F -</b><br>TCTTCCTTGCACACATGAAACC<br><b>R -</b><br>TCCAGGGTATGATTGACCAGT |
| Prolactin ( <i>PRL</i> )             | XM_005506024.2               | 181                                 | 92.6                  | <b>F -</b><br>GGCGGGTTCATACTGGTGAG<br><b>R -</b><br>TGGATTAGGCGGCACTTCAG    |
| Beta actin ( <i>ACTB</i> )           | AB980793.1                   | 147                                 | 95.5                  | <b>F -</b><br>TTAACCAACACCCACACCCTT<br><b>R -</b><br>GACACCTTCACCGTTCCAGTT  |
| Ribosomal protein L4 ( <i>rpL4</i> ) | XM_005511196.1               | 78                                  | 105.4                 | <b>F -</b><br>GCCGGAAAGGGCAAATGAG<br><b>R -</b> GCCGTTGTCCTCGTTGTAGA        |

873

874 **Supplemental Table 2. Primers used in quantitative PCR.** All primers were designed using the NCBI

875 Primer-BLAST tool using gene sequences specific to *Columba livia* (NCBI Accession numbers show the

876 specific gene sequence from which the primers were designed). Replication efficiencies are based upon a  
877 standard curve of five 10-fold dilutions of purified gene product.

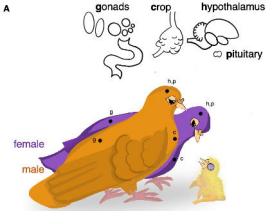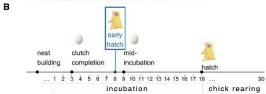



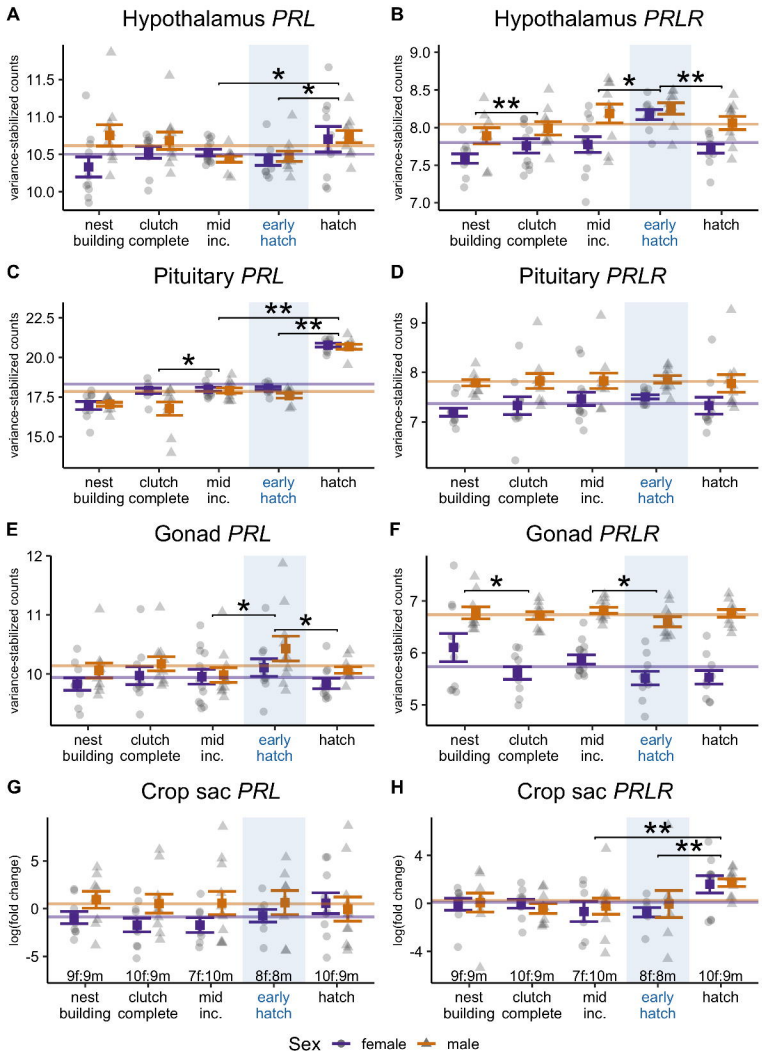

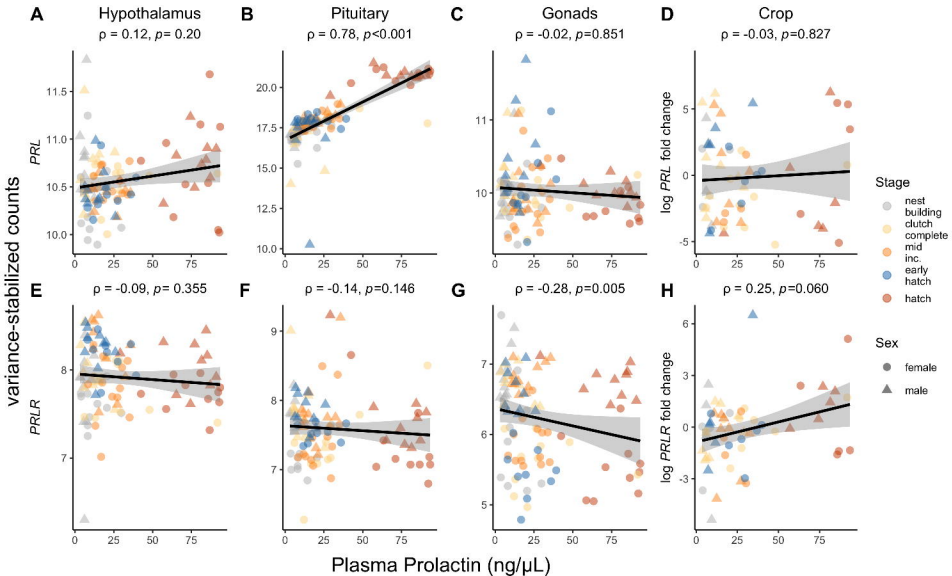





| Contrasts                                               | Circulating Prolactin              | PRL                               |                                   |                                  |                                  | PRLR                             |                                  |                                   |                                   |
|---------------------------------------------------------|------------------------------------|-----------------------------------|-----------------------------------|----------------------------------|----------------------------------|----------------------------------|----------------------------------|-----------------------------------|-----------------------------------|
|                                                         |                                    | Hypothalamus                      | Pituitary                         | Gonads                           | Crop                             | Hypothalamus                     | Pituitary                        | Gonads                            | Crop                              |
| <b>COMPARISONS BY STAGE</b>                             |                                    |                                   |                                   |                                  |                                  |                                  |                                  |                                   |                                   |
| <b>Reproductive stages compared with adjacent stage</b> |                                    |                                   |                                   |                                  |                                  |                                  |                                  |                                   |                                   |
| Clutch completion – nest building                       | 11.94 ± 3.99,<br><i>p</i> = 0.003  | n.s.                              | n.s.                              | n.s.                             | n.s.                             | 0.21 ± 0.10,<br><i>p</i> = 0.040 | n.s.                             | -0.27 ± 0.13,<br><i>p</i> = 0.040 | n.s.                              |
| Mid-incubation – clutch completion                      | n.s.                               | n.s.                              | 0.61 ± 0.30,<br><i>p</i> = 0.043  | n.s.                             | n.s.                             | n.s.                             | n.s.                             | n.s.                              | n.s.                              |
| Hatch – mid-incubation                                  | 54.57 ± 3.95,<br><i>p</i> < 0.001  | 0.23 ± 0.10,<br><i>p</i> = 0.026  | 2.79 ± 0.30,<br><i>p</i> < 0.001  | n.s.                             | n.s.                             | n.s.                             | n.s.                             | n.s.                              | 2.08 ± 0.61,<br><i>p</i> < 0.001  |
| <b>Manipulation group compared with controls</b>        |                                    |                                   |                                   |                                  |                                  |                                  |                                  |                                   |                                   |
| Early hatch – mid-incubation                            | n.s.                               | n.s.                              | n.s.                              | 0.29 ± 0.13,<br><i>p</i> = 0.022 | n.s.                             | 0.24 ± 0.10,<br><i>p</i> = 0.019 | n.s.                             | -0.29 ± 0.12,<br><i>p</i> = 0.02  | n.s.                              |
| Early hatch – hatch                                     | -56.55 ± 3.81,<br><i>p</i> < 0.001 | -0.27 ± 0.10,<br><i>p</i> = 0.011 | -3.28 ± 0.31,<br><i>p</i> < 0.001 | 0.32 ± 0.13,<br><i>p</i> = 0.018 | n.s.                             | 0.32 ± 0.10,<br><i>p</i> = 0.002 | n.s.                             | n.s.                              | -2.05 ± 0.63,<br><i>p</i> = 0.002 |
| <b>COMPARISONS BY SEX</b>                               |                                    |                                   |                                   |                                  |                                  |                                  |                                  |                                   |                                   |
| Males - females                                         | -7.86 ± 2.44,<br><i>p</i> = 0.002  | n.s.                              | -0.47 ± 0.19,<br><i>p</i> = 0.016 | 0.20 ± 0.08,<br><i>p</i> = 0.019 | 1.38 ± 0.65,<br><i>p</i> = 0.036 | 0.22 ± 0.07,<br><i>p</i> = 0.001 | 0.44 ± 0.09,<br><i>p</i> < 0.001 | 1.00 ± 0.08,<br><i>p</i> < 0.001  | n.s.                              |
